1 **Prognostics for pain in osteoarthritis: Do clinical measures predict pain after total joint**  
2 **replacement?**

3

4 Joana Barroso MD<sup>1,2,3</sup>, Kenta Wakaizumi MD PhD<sup>2,4</sup>, Diane Reckziegel PhD<sup>3</sup>, João Pinto-Ramos  
5 MD<sup>5</sup>, Thomas Schnitzer MD PhD<sup>2,6</sup>, Vasco Galhardo PhD<sup>1</sup>, A. Vania Apkarian PhD<sup>2,3</sup>.

6

7 **Affiliations:**

8 <sup>1</sup>Departamento de Biomedicina, Faculdade de Medicina, Universidade do Porto, Porto, Portugal;  
9 Instituto de Investigação e Inovação em Saúde - i3S, Universidade do Porto, Porto, Portugal.

10 <sup>2</sup>Department of Physical Medicine and Rehabilitation, Northwestern University, Feinberg School  
11 of Medicine, Chicago, IL, USA.

12 <sup>3</sup>Department of Physiology, Northwestern University, Feinberg School of Medicine, Chicago, IL,  
13 USA.

14 <sup>4</sup>Shirley Ryan AbilityLab, Chicago, IL, USA.

15 <sup>5</sup>Departamento de Medicina Física e de Reabilitação, Centro Hospitalar e Universitário de São  
16 João. Porto, Portugal.

17 <sup>6</sup>Department of Rheumatology, Northwestern University, Feinberg School of Medicine, Chicago,  
18 IL, USA.

19

20 **Corresponding author:**

21 Dr. A.V. Apkarian, PhD

22 Northwestern University, Feinberg School of Medicine

23 Tarry Bldg. 7-705, Chicago, Illinois 60611 USA

24 Phone Office: (312) 503-0404 Fax (312)503-5101

25 Email:a-apkarian@northwestern.edu

26

27

28 **Author Contributions:**

29 **J.B.** designed and conducted the experiment, collected and analyzed the data and wrote the  
30 manuscript. **K.W** contributed to the data analysis and manuscript writing, **D.R.** contributed to  
31 the manuscript writing. **J.P.R** performed data collection. **T.J.S** and **V.G.** contributed to the

32 experiment design and manuscript writing. **A.V.A** supervised the experimental design, data  
33 analysis and wrote the manuscript. All authors contributed to the final manuscript.

34

35 **Disclosures:**

36 J.B. was funded through CCDRN [Norte-08-5369-FSE-000026], OARSI Collaborative Scholarship  
37 2018 and Luso-American Development Foundation R&D@PhD scholarship grant. This research  
38 did not receive other specific funding from agencies in the public or commercial sectors.

39

40

41

42

43

44

45

46

47

48

49

50

51

52

53

54

55

56

57

58

59

60

61

62

63

64

65

66

67

68

69

70

71

72

73 **Abstract**

74

75 A significant proportion of osteoarthritis (OA) patients continue to experience moderate to  
76 severe pain after total joint replacement (TJR). Preoperative factors related to pain persistence  
77 are mainly studied using individual predictor variables and distinct pain outcomes, thus leading  
78 to a lack of consensus regarding the influence of preoperative parameters on post-TJR pain. In  
79 this prospective observational study, we evaluated knee and hip OA patients before, 3 and 6  
80 months post-TJR searching for clinical predictors of pain persistence. We assessed multiple  
81 measures of quality, mood, affect, health and quality of life, together with radiographic  
82 evaluation and performance-based tasks, modeling four distinct pain outcomes. Multivariate  
83 regression models and network analysis were applied to pain related biopsychosocial measures  
84 and their changes with surgery. A total of 106 patients completed the study. Pre-surgical pain  
85 levels were not related to post-surgical residual pain. Although distinct pain scales were  
86 associated with different aspects of post-surgical pain, multi-factorial models did not reliably  
87 predict post-surgical pain in knee OA (across four distinct pain scales) and did not generalize to  
88 hip OA. However, network analysis showed significant changes in biopsychosocial-defined OA  
89 personality post-surgery OA, in both groups. Our results show that although tested clinical and  
90 biopsychosocial variables reorganize after TJR in OA, their presurgical values are not predictive  
91 of post-surgery pain. Derivation of prognostic markers for pain persistence after TJR will require  
92 more comprehensive understanding of underlying mechanisms.

93

94 **Keywords:** osteoarthritis, pain, post-surgical pain, arthroplasty, clinical risk factors, outcomes.

95 **Introduction**

96

97 Osteoarthritis is the most common cause of arthritis worldwide and a major source of chronic  
98 musculoskeletal pain. Although nociceptive inputs elicited by joint degeneration and chronic  
99 inflammation are commonly recognized as contributing factors, current understanding of OA  
100 pain pathophysiology remains incomplete. In the last few years, a growing body of research  
101 indicates that altered peripheral and central nociceptive processes are influential [1]. This is  
102 substantiated by the discordance in joint structural damage and pain intensity [2], but also by the  
103 results of surgical treatment [3]. Total joint replacement (TJR) is an effective and safe intervention  
104 for advanced hip and knee OA; nevertheless, an important proportion of patients still report  
105 moderate to severe persistent pain post-TJR, not attributable to identifiable surgical or clinical  
106 complications. In the case of knee OA (KOA), persistent post-surgical pain is reported in about  
107 20% of the patients. For hip OA (HOA), this number appears to be lower (up to 10%) [4].

108 Persistent post-TJR pain remains minimally understood. Post-surgical pain is defined as pain that  
109 occurs or intensifies after the procedure and lasts for at least 3 months [5]. However, in OA, long-  
110 lasting chronic pain pre-exists and is the main impetus for undergoing TJR, which complicates  
111 understanding post-surgical outcomes. Thus, it remains unclear the extent to which the post-  
112 surgical OA pain reflects residual presurgical pain, surgery induced pain, or some complex  
113 combination of both [6].

114 Regarding risk factors for pain persistence after TJR, those have been proposed, are mainly for  
115 KOA [7]. Pain intensity prior to surgery, disproportion between pain intensity and articular  
116 damage, neuropathic-like symptoms, psychosocial factors such as pain catastrophizing and poor  
117 coping strategies [8] are commonly referenced as important predictive factors. Although these  
118 have been studied repeatedly, there is extensive variation of outcome measures used and there  
119 is no agreement on which measures are optimal to assess chronic pain after TJR [7]. The  
120 proposed risk factors across studies are often diverse, tested through univariate associations,  
121 based on different study designs and analysis methods, thus the quality of evidence on prognostic  
122 factors for recovery after total knee replacement (TKA) remains low [9].

123 Here, in a prospective cohort study, we test the hypothesis that presurgical pain and pain-related  
124 psychosocial parameters contribute to post-TJR pain. We examine how distinct pain  
125 measurement instruments relate to different aspects of pain in OA, and attempt to develop and  
126 evaluate models predictive of pain and pain relief after surgery for knee and hip OA pain.  
127 Additionally, by using a network analysis approach, we assess the reorganization of pain related  
128 clinical and biopsychosocial properties of the personality of KOA and HOA patients after TJR.

129

## 130 **2. Materials and Methods**

131

### 132 **2.1 Study sample**

133

134 KOA and HOA patients with clinical indications for primary arthroplasty surgery participated in  
135 this longitudinal observational study. The present report is part of a brain neuroimaging study,  
136 studying central mechanisms in osteoarthritis, which will be reported subsequently.

137 Enrollment took place at the Orthopedic Surgery Department of *Centro Hospitalar de São João*,  
138 a tertiary care hospital in Porto, Portugal. Study protocol was approved by the local Ethics  
139 Committee, and all participants provided informed written consent prior to partaking in the  
140 study. Sample size was determined by the number of patients waiting for surgery who met the  
141 eligibility criteria for the study, during a period of 20 months. Initial evaluation happened 1-3  
142 months before TJR surgery and follow-up continued up to 6 months after surgery. A total of 95  
143 knee OA and 25 hip OA patients, and 37 healthy control subjects were included (the last group  
144 not studied in this report).

145 Eligible patients met the following inclusion criteria: age between 45 and 75 years-old; diagnosis  
146 of HOA and KOA according to the clinical classification criteria of the *American College of*  
147 *Rheumatology*, and surgical indications for TJR (criteria for surgery selection was moderate to  
148 severe pain and quality of life impairment, after clinical and radiological evaluation and medical  
149 decision by a certified orthopedic surgeon in our center). Patients were excluded when there was  
150 evidence of secondary OA due to congenital or development diseases and inflammatory bone  
151 and articular diseases. Bilateral OA with predicted indication for contralateral arthroplasty in the

152 following year, other chronic pain conditions (e.g., fibromyalgia; chronic pelvic pain) and chronic  
153 neurological or psychiatric disease (e.g., depression major, dementia, obsessive compulsive  
154 disorders, Parkinson's disease, demyelinating diseases, peripheral sensory neuropathy), were  
155 also exclusion criteria, as well as cognitive impairment. Previous history of stroke or traumatic  
156 brain injury was also exclusionary. Secondary OA following history of minor trauma or previous  
157 arthroscopy surgery due to ligamentous/meniscal injury was not an exclusion criterion.

158

## 159 **2.2 Study design**

160 This study comprised a total of 4 visits. Patients were initially assessed 1-3 months before surgery  
161 (V1). A second pre-surgical visit was held 2 to 6 weeks prior surgery (V2). Two post-surgical visits  
162 (V3-V4) occurred at 3 months and 6 months post-surgery. Specific data collected at each visit are  
163 shown in **figure 1**. During visits 1, 3 and 4 patients were assessed for: (1) Clinical and socio-  
164 demographic properties; (2) physical function – performance-based tests; (3) radiographic  
165 evaluation, (4) pain, mood and health questionnaires; brain imaging was performed at visits 2  
166 and 4.

167 **Figure 1. Experimental design, timeline and data collected.** Knee and hip osteoarthritis patients  
168 entered a 4 visit (V1-V4), pre- and post-total joint replacement surgery, longitudinal,  
169 observational study. V1 and V2 occurred before surgery. V3 and V4 took place at 3 and 6 months  
170 after surgery. At each visit, participants underwent a series of assessments. \*Brain MRI session.  
171 mo, months; MRI, magnetic resonance imaging; T1WI, T1-weighted imaging; rsfMRI, resting state  
172 functional magnetic resonance imaging; DTI, diffusion tensor imaging.

173

## 174 **2.3 Measures**

175

### 176 **2.3.1 Clinical and demographic assessment**

177

178 Demographic profiling, acquired at V1, included age, education and professional status. Medical  
179 data concerning height and weight, pre-surgical co-morbid conditions, previous surgeries,  
180 general medication and smoking habits were recorded at patient interview and by clinical charts  
181 analysis. A clinical questionnaire regarding the history and evolution of knee pain assessed pain  
182 onset, duration and frequency; pain medication and previous non-pharmacological treatments.  
183 The Medicine Quantification Scale (MQS) was used to score type and dose of pain medication  
184 [10]

185 At the post-surgical visits (V3-V4) a second clinical questionnaire assessing pain recovery, time to  
186 recovery, patient satisfaction, pain medication, use of health care services and rehabilitation  
187 protocol was administered.

188

### 189 **2.3.2 Physical function – performance-based tests**

190

191 Physical function was assessed with two different tests, depending on the activity measured.  
192 Ambulatory transitions were evaluated with the Timed up and go test (TUG) [11], and aerobic  
193 capacity/walking long distances with the six-minute walk test (6MWT) [12-14]. These tests were  
194 selected based on the *OARSI* 2013 recommendations [15].

195

### 196 **2.3.3 Radiographic assessment**

197

198 As part of standard hospital protocol, patients scheduled for TJR had bilateral joint radiographs  
199 during the 6 months before surgery. Knee OA radiographs were taken in two views: anterior-  
200 posterior (AP) weight-bearing with knee flexion at 20° and foot internal rotation at 5°, and  
201 horizontal beam lateral view, with lateromedial projection, the patient in supine position and the  
202 knee flexed at 30°. Hip OA patients had AP supine radiograph of the pelvis, with lower limbs  
203 internally rotated 15° degrees from the hip.

204 Radiographs were scored accordingly to the Kellgren-Lawrence (KL) classification - grades 0 to  
205 4 [16], by two trained radiologists. The first classified the whole sample, the second classified half  
206 of the subjects for inter-reliability measurement. Both researchers were blind to the clinical data

207 of the patients when scoring. Inter-rater reliability was determined for KOA imaging only and the  
208 intra-class correlation coefficient of KL grading was 0.91 (95% confidence interval 0.80-0.93).

209

### 210 **2.3.4 Questionnaires – Pain, Mood and Health**

211

212 Seven questionnaires were administered by a trained clinician, during face-to-face interview.  
213 They were administered both before surgery (V1), and in the post-surgical visits (V3-V4). The  
214 repeated use of the same measures allowed us to track changes concerning intensity and quality  
215 of pain, emotion and affect, health and quality of life. All questionnaires were used in their  
216 validated Portuguese version. We assessed: 1) KOOS, HOOS, validated injury and OA outcome  
217 scores for knee and hip [17-19]; 2) Brief Pain Inventory – Short Form (BPI) [20-22]; 3) McGill Pain  
218 Questionnaire (MPQ) [23, 24]; 4) Doleur Neuropathique en 4 Questions (DN4) [22, 25]; 5)  
219 Hospital Anxiety and Depression Scale (HADS) [26, 27]; 6) Pain Catastrophizing Scale (PCS) [22,  
220 28]; and 7) SF36-item Short Form Survey (SF36) [29, 30] .

221

### 222 **2.4 Primary outcome variables**

223

224 Primary outcome variables were part of the questionnaires/clinical assessments and consisted of  
225 4 distinct pain intensity related scales/subscales: Numeric Rate Scale (NRS); BPI – Pain Severity;  
226 KOOS Pain and HOOS Pain, as clinically appropriate; SF36 Bodily Pain, here addressed specifically  
227 for knee/hip articular pain.

228 For each of the 4 outcome measures and for an aggregate of all four, we examined relationships  
229 for pain relief post-surgery on a per subject basis, by calculating residual pain: %residual pain =  
230  $100 - (100 * (\text{average pain pre-surgery} - \text{post-surgery pain [at 3, or 6, months]}) / \text{average pain pre-}$   
231  $\text{surgery}))$ . Thus, 100% residual pain = no change in a given pain measure between before and  
232 after surgery; 0% residual pain = complete relief from initial pain; while values >100% indicate  
233 worsening of pain post-surgery.

234 As the literature more commonly reports on the effect of pre-surgery baseline pain [9], we also  
235 examined and modeled influence of baseline pain on post-TJR pain.



236

## 237 **2.5 Statistical analysis**

238

239 All data from the reported measures were manually entered by the same researcher. Regarding  
240 missing data, when at least 30% was missing from a questionnaire (total or sub-score if  
241 applicable), it was excluded. When missing data were less than the threshold 30%, we used the  
242 mean of the total score/sub-score to fill in missing items.

243 Descriptive statistics were used to describe the study sample, with continuous variables  
244 presented as mean and standard deviations and categorical data as numbers and percentages.  
245 Comparisons between the two OA groups used independent sample t-tests or Chi-square( $X^2$ )  
246 tests, for continuous parametrical variables and categorical data respectively.

247 Interrelationship of the primary outcome variables (all scored on a 0-10 score) was assessed  
248 through correlation analysis using Pearson product-moment tests. The effects of time (pre-, 3-  
249 and 6-months post-surgery), type of OA and pain outcome measure on pain intensity were  
250 studied with a three-way mixed ANOVA. Following the initial procedure, two-way interactions  
251 and simple main effects were considered and pairwise comparisons with Bonferroni adjustments  
252 were performed.

253 A data dimensionality reduction from all 19 subscales of 7 questionnaires and 2 physical  
254 performance scores was achieved using a principal component analysis (PCA) in KOA patients at  
255 baseline. Overall and individual Kaiser-Meyer-Olkin measures were 0.86 and >0.5 respectively.  
256 Threshold for component retention was set on eigenvalues >1.0, together with visual inspection  
257 of the scree plot for evaluation of the inflection point. A factor rotation on the obtained  
258 components was applied using a Promax oblique rotation technique. Threshold of factor loading  
259 was set on 0.5/-0.5 and components were labeled given the observed loadings. Due to the limited  
260 number of subjects available in the HOA group, we generated the component values using the  
261 same weights retrieved with PCA for the KOA, which enables direct comparison of TJR effects on  
262 network properties.

263 Different regression analysis techniques were used to model pain outcomes in KOA and HOA. For  
264 KOA, multifactorial regression models were generated using a stepwise forward and backward

265 selection method, in an automatic step-by-step iterative construction of the model. Significance  
266 level to enter ( $\alpha$ -to-enter) was set at 0.05 and  $\alpha$ -to-remove at 0.10. To test if the models obtained  
267 in KOA replicated in HOA patients, and due to a smaller sample size in this group, we applied a  
268 multiple linear regression analysis in HOA, entering as independent variables the predictor  
269 factors uncovered for KOA, thus testing the extent of shared factors between the two conditions.  
270 For all regression models, assumptions of linearity, independence of observations,  
271 homoscedasticity and absence of multicollinearity were met, and residuals were approximately  
272 normally distributed in all models. Outliers were detected by examining studentized deleted  
273 residuals, any values greater than  $\pm 3$  standard deviations were removed. Throughout all models,  
274 no more than 3 cases were removed.

275 A composite measure of pain intensity was built averaging the four outcome scales. Here, a two-  
276 way mixed effects ANOVA was conducted to study differences in pain levels across time and type  
277 of OA. The same regression analysis methodology was applied to this new variable in HOA and  
278 KOA groups.

279 Correlation matrices of the clinical and psychological variables (questionnaires subscales and  
280 physical performance scores) were represented as binarized networks, constructed at the 25%  
281 stronger correlations for each matrix (KOA/HOA at baseline, 3- and 6-months post-surgery), and  
282 visualized using the software Cytoscape (v3.6.1, <http://www.cytoscape.org>). For each network,  
283 questionnaire measures were represented as nodes and the thresholded correlations as edges.  
284 Network communities were derived from the previous PCA. Two network graph measures were  
285 computed to characterize and quantify topological changes, using the Matlab Brain Connectivity  
286 Toolbox [31]. Clustering coefficient is a measure of the extent to which nodes in a graph tend to  
287 cluster together. Nodes have the trend to create groups characterized by a high density of  
288 connections. We computed local clustering coefficient of all nodes, and averaged them, reflecting  
289 the overall level of clustering in a network, from 0 (no clustering) to 1 (maximal clustering). The  
290 second calculated measure, modularity, refers to the compartmentalization and interrelation of  
291 modules in a network. Modules can be defined as sets of nodes densely connected among  
292 themselves and poorly connected to other regions of the network. Using the Louvain community

293 detection algorithm, averaged over 100 computed repetitions, we obtained values that vary from  
294 0 (random network) and 1 (highly structured network).

295 We studied the changes in the strength of connectivity for all networks, calculating the change  
296 in correlation coefficients for all pairs of subscales from baseline to three and six months, and  
297 averaging these over the entire networks, obtaining the mean  $\Delta R$ . For all inter and intra-group  
298 comparisons, regarding network measures and change in correlation coefficients, statistical  
299 probability was computed with 10,000 repeated random resampling.

300 All data were analyzed using the Statistical Package for the Social Sciences (IBM Corp. Released  
301 2016. IBM SPSS Statistics for Windows, Version 24.0. Armonk, NY: IBM Corp), JMP software  
302 (JMP®, Version 14. SAS Institute Inc., Cary, NC, 1989-2007) and MATLAB (MATLAB and Brain  
303 Connectivity Toolbox release 2016a, The Mathworks, Inc., Natick, Massachusetts, US).

304

## 305 **Results**

306

### 307 **3.1 Recruitment, assessment and participant characteristics**

308

309 A total of 94 KOA and 25 HOA patients were eligible and agreed to participate in this longitudinal,  
310 observational study. At 6 months, a total of 84 KOA and 22 HOA completed the study. **Figure 2**  
311 presents patient and control participants flowchart and timeline. Causes for withdrawal included:  
312 revision arthroplasty due to periprosthetic infection or prosthesis displacement (n=4); other co-  
313 morbidities (n=2, concomitant oncological disease) and voluntary withdrawal (n=12).

314 **Table 1** describes HOA and KOA patients' demographic characteristics. Mean age of KOA patients  
315 was greater than that of HOA patients; the KOA group was predominantly female while the HOA  
316 group included mostly males. Body mass index (BMI) was higher in KOA than HOA patients.  
317 Smoking habits, educational level and habitation status were similar between HOA and KOA.  
318 Regarding occupational status, for the KOA group the most common status was retirement; HOA  
319 patients were mainly on medical leave, which relates to their differences in age.

320

321 **Figure 2. Recruitment and retention for KOA and HOA, and healthy control participants.** The  
 322 full battery of assessments was performed in osteoarthritis patients. Healthy individuals were  
 323 recruited to act as controls in brain imaging analyses (not reported here). All patients were  
 324 recruited from the same tertiary care hospital. Healthy participants were recruited from the  
 325 general population in the Porto area.  
 326 IC, Inclusion criteria; MRI, magnetic resonance imaging; KOA, knee osteoarthritis; HOA, hip  
 327 osteoarthritis; THR, total hip replacement; TKR, total knee replacement.

328 **Table 1. Demographic characteristics of KOA and HOA patients.**  
 329

|                                        | KOA                      | HOA              | <i>t</i> / <i>X</i> <sup>2</sup> | <i>p</i>         |
|----------------------------------------|--------------------------|------------------|----------------------------------|------------------|
| <b>Age, Mean±SD</b>                    | 65.6 ± 0.7               | 60 ± 1.6         | 4.005                            | <b>&lt;0.001</b> |
| <b>Gender, Count, %</b>                | 75 (79.8) / 19<br>(20.2) | 8 (32) / 17 (68) | 21.37                            | <b>&lt;0.001</b> |
| <b>BMI, kg/m<sup>2</sup>, Mean±SD</b>  | 30.3 ± 0.5               | 28.2 ± 0.7       | 2.027                            | <b>0.045</b>     |
| <b>Smoking Status, Count, %</b>        |                          |                  |                                  |                  |
| Active smoker                          | 8 (8.5)                  | 2 (8)            | 1.176                            | 0.556            |
| Former smoker                          | 14 (14.9)                | 6 (24)           |                                  |                  |
| Non-smoker                             | 72 (76.6)                | 17 (68)          |                                  |                  |
| <b>Education Level, Count, (%)</b>     |                          |                  |                                  |                  |
| Primary school                         | 74 (78.4)                | 17 (68)          | 1.176                            | 0.407            |
| Secondary school                       | 15 (16)                  | 5 (20)           |                                  |                  |
| Graduate                               | 5 (5.3)                  | 3 (12)           |                                  |                  |
| <b>Professional Status, Count, (%)</b> |                          |                  |                                  |                  |
| Retired                                | 67 (70.5)                | 9 (36)           | 14.424                           | <b>0.006</b>     |
| Active                                 | 16 (16.8)                | 2 (8)            |                                  |                  |
| Medical leave                          | 12 (12.6)                | 14 (56)          |                                  |                  |
| <b>Habitation, Count, (%)</b>          |                          |                  |                                  |                  |
| Alone                                  | 17 (18.1)                | 3 (12)           | 0.523                            | 0.48             |
| Cohabitation                           | 77 (81.9)                | 22 (88)          |                                  |                  |

330 Differences between groups were tested using T-test for continuous and parametric variables (*t*),  
 331 and Chi-square tests for categorical data (*X*<sup>2</sup>). P-values <0.05 were considered significant  
 332 (bolded). BMI, body mass index; F/M= female/male; KOA, knee osteoarthritis; HOA, hip  
 333 osteoarthritis.  
 334

### 335 **3.2 Pain intensity as a function of type of pain measurement instrument, surgery, time, and OA** 336 **joint involvement**

337

338 We examined the pain intensity determined by our four pain outcome measures (NRS, KOOS  
339 pain, BPI pain severity, SF-36 pain), both at baseline and after surgery, in KOA and HOA patients,  
340 and then evaluated their interrelationship (**Table 2**). All pain magnitudes decreased post-surgery,  
341 correlations among measures generally strengthened. Mean post-surgical pain levels (across all  
342 measures) was lower in the HOA group than in the KOA group, and the pain intensity estimate  
343 was highest with the SF-36 pain scale.

344 A three-way ANOVA was conducted to determine the effects of time (pre-, 3, 6, months post-  
345 surgery), the four pain outcome measures, and the type of joint OA, on pain intensity. We found  
346 a non-significant three-way interaction between these variables. The two-way interactions were  
347 statistically significant between pain measures and time ( $F(6,624)=5.231, p<0.001$ ); type of OA  
348 and time ( $F(2,624)=4.096, p=0.022$ ); but not type of OA and types of pain measures  
349 ( $F(3,624)=2.021, p=0.129$ ). These results reveal that questionnaires show a similar rating pattern  
350 for hip and knee OA, but they vary in different ways over time. Moreover, decrease in pain over  
351 time is larger for HOA in comparison to KOA.

352 Main effects of pain measurement types were statistically significant at baseline, 3 and 6 months  
353 ( $F(3,315)=66.6, p<0.001$ ;  $F(3,315)=51.03, p<0.001$ ;  $F(3,315)=41.02, p<0.001$ ). Pairwise  
354 comparisons revealed that at baseline, pain intensity estimates were lowest for BPI pain severity,  
355 (mean differences - NRS: -1.72 [-2.44, -0.99], KOOS/HOOS: -1.436 [-2.158, -0.71], SF36: -2.06 [-  
356 2.78, -1.4],  $p<0.001$ ). At 3 and 6 months after surgery pain intensity was higher when measured  
357 by SF-36 pain (mean differences at 3 months: NRS: 1.269 [0.509,2.03], BPI:1.566 [0.8,2.33], KOOS  
358 [0.24,1.76],  $p<0.003$ ; at 6 months: NRS: 1.038 [0.23,1.81], BPI: 1.354 [0.57,2.14],  $p<0.003$ ). Thus,  
359 one cannot assume that these different measurements are equivalent.

360 Joint involvement was also significant: KOA patients had higher levels of reported pain at baseline  
361 than HOA patients (mean difference: 0.55 [0.17,0.93],  $p=0.005$ ), while HOA surgery resulted in a  
362 larger decrease in pain intensity than KOA surgery (mean differences at 3 months: 1.462  
363 [1.06,1.87] and 6 months: 1.21 [0.8,1.62],  $p$  value  $<0.001$ ).

364 The main effect of time on pain intensity showed that from baseline to 3 months there is a large  
 365 decrease in pain intensity. There was no change in pain intensity between 3 months and 6  
 366 months, revealing that pain levels were stable from 3 months onwards in both OA groups (mean  
 367 differences, KOA: Baseline-3 months 3.8 [3.512,4.124]  $p < 0.001$ ; 3 months-6 months: 0.139 [-  
 368 1.76,0.45],  $p = 0.8$ ; HOA: Baseline-3 months 4.73 [4.133,5.332]  $p < 0.001$ ; 3 months-6 months:  
 369 0.112 [-0.512,0.736],  $p = 0.9$ ).

370 Correlations between pain measure types pre-surgery were significantly positive in both OA  
 371 groups, generally stronger in KOA than HOA, although these differences were relatively small. At  
 372 3- and 6-months post-surgery, the strength of the correlation of pain measures in the HOA group  
 373 correlations were maintained; however, for the KOA, there was a strengthening of the  
 374 correlations from baseline. Changes in correlations between pain measures by OA type, post-  
 375 surgery imply that the characteristics of the pain itself is shifting distinctly post-surgery for each  
 376 type of OA.

377

378 **Table 2. Pain in KOA and HOA patients pre- and post-surgery, characterized with four pain**  
 379 **outcome measures.**

380

| Pain Outcome Measure  |      |      |         |         |         |
|-----------------------|------|------|---------|---------|---------|
| Baseline              |      |      |         |         |         |
| Knee OA (n=84)        | M    | SD   | (1)     | (2)     | (3)     |
| (1) BPI Pain Severity | 4.79 | 1.5  |         |         |         |
| (2) NRS               | 6.53 | 1.67 | .792**  |         |         |
| (3) KOOS Pain         | 6.49 | 1.49 | .266**  | .313**  |         |
| (4) SF-36 Pain        | 7.04 | 1.82 | .162*   | .288*   | .475**  |
| Hip OA (n=22)         |      |      |         |         |         |
| (1) BPI Pain Severity | 4.38 | 1.52 |         |         |         |
| (2) NRS               | 6.09 | 1.66 | .801**  |         |         |
| (3) HOOS Pain         | 5.86 | 1.63 | .564*   | .405    |         |
| (4) SF-36 Pain        | 6.49 | 1.55 | .547*   | .474*   | .631*   |
| 3 Months              |      |      |         |         |         |
| Knee OA (n=84)        | M    | SD   | (1)     | (2)     | (3)     |
| (1) BPI Pain Severity | 1.69 | 1.48 |         |         |         |
| (2) NRS               | 1.89 | 2.03 | .922**† |         |         |
| (3) KOOS Pain         | 2.45 | 1.96 | .837**† | .809**† |         |
| (4) SF-36 Pain        | 3.39 | 2.25 | .750**† | .771**† | .774**† |
| Hip OA (n=22)         |      |      |         |         |         |
| (1) BPI Pain Severity | 0.54 | 1.05 |         |         |         |
| (2) NRS               | 0.55 | 1.06 | .920**  |         |         |

|                       |          |           |                     |                     |                     |
|-----------------------|----------|-----------|---------------------|---------------------|---------------------|
| (3) HOOS Pain         | 0.79     | 0.88      | .257                | .159                |                     |
| (4) SF-36 Pain        | 1.95     | 1.71      | .329                | .356*               | .381*               |
| <b>6 Months</b>       |          |           |                     |                     |                     |
| Knee OA (n=84)        | <b>M</b> | <b>SD</b> | <b>(1)</b>          | <b>(2)</b>          | <b>(3)</b>          |
| (1) BPI Pain Severity | 1.70     | 1.53      |                     |                     |                     |
| (2) NRS               | 2.01     | 1.9       | .930** <sup>†</sup> |                     |                     |
| (3) KOOS Pain         | 2.19     | 2.17      | .813** <sup>†</sup> | .784** <sup>†</sup> |                     |
| (4) SF-36 Pain        | 2.98     | 2.26      | .671* <sup>†</sup>  | .652** <sup>†</sup> | .791** <sup>†</sup> |
| Hip OA (n=22)         |          |           |                     |                     |                     |
| (1) BPI Pain Severity | 0.63     | 0.76      |                     |                     |                     |
| (2) NRS               | 0.73     | 0.93      | .961** <sup>†</sup> |                     |                     |
| (3) HOOS Pain         | 0.80     | 0.77      | .379                | .280*               |                     |
| (4) SF-36 Pain        | 1.98     | 1.87      | .471*               | .479*               | .559**              |

381 Four scales were used (BPI Pain Severity, NRS, HOOS Pain, SF-36 Pain; all presented on a 0-10  
 382 scale) to assess pain pre-surgery (Baseline) and 3, and 6 months post-surgery. Mean (M),  
 383 standard deviation (SD) and Pearson's product-moment correlations between the 4 scales are  
 384 presented. For both OA groups the four measures decrease in amplitude after surgery and are  
 385 correlated with each other, improving following surgery in the KOA group. \* p<0.05; \*\*p<0.01.  
 386 <sup>†</sup>Significant increase in correlation from baseline, p<0.05. KOA, knee osteoarthritis; HOA, hip  
 387 osteoarthritis; BPI Severity, Brief Pain Inventory Pain: severity subscale; HOOS Pain, Hip Injury  
 388 and Osteoarthritis Outcome Score: pain subscale; NRS, Numeric Rating Scale; SF36 Pain, Short-  
 389 form (36) Health Survey: pain subscale.

390

### 391 3.3 Pre-surgical pain levels mostly do not relate to post-surgical pain relief

392

393 For all 4 pain outcome measures, we examined the relationship between pre-surgical pain and  
 394 residual pain after surgery (100% residual pain meaning no change; 0% residual pain rendering  
 395 complete relief), both for KOA and HOA at 3- and 6-months following surgery (**Figure 3**), as well  
 396 as pre-surgery values in relation pain after surgery (figure 4). We observed mostly weak and  
 397 statistically not significant correlations between pre-surgical pain intensity and residual pain  
 398 (except BPI pain at 3 months for KOA; NRS at 6 months for HOA; both were weakly negatively but  
 399 statistically significantly related to pre-surgery values). Similarly, post-surgery pain was weakly  
 400 and mostly not significantly related to pre-surgery pain (except KOOS at 3 months; and sf36 at 3  
 401 and 6 months, for KOA and HOA; all of these were statistically significantly positively related to

402 pre-surgical measures). Both, residual pain and pain, show generally weak relationships with pre-  
403 surgery pain, and the relationships are often inconsistent with each other, indicating that pre-  
404 surgical pain levels are not consistent predictors of post-surgery measures.

405

406 **Figure 3. Influence of baseline pain levels on post-surgical residual pain.**

407 The scatterplots depict patients' percentage residual pain after surgery (% residual pain, where  
408 100% = no change from pre-surgical levels, 0% = full recovery) **(a)**, and post-surgery absolute  
409 pain intensity **(b)** relative to pre-surgical levels, as a function of pre-surgical levels, for all four  
410 pain outcome measures **(a)** for KOA and HOA, at 3 (blue) and 6 (red) months post-surgery.  
411 Symbols represent subjects. Shaded areas indicate 95% confidence intervals. BPI Severity, Brief  
412 Pain Inventory Pain: severity subscale; HOOS Pain, Hip Injury and Osteoarthritis Outcome Score:  
413 pain subscale; NRS, Numeric Rating Scale; SF36 Pain, Short-form (36) Health Survey: pain  
414 subscale.

415

416

417 **3.4 OA related dimensions**

418

419 Considering the broad battery of questionnaires and clinical measures collected, we sought to  
420 use a data dimensionality reduction approach to define dominant behavioral/clinical factors  
421 underlying OA pain. To this end, we applied a PCA analysis to the questionnaires and physical  
422 performance tests at baseline, focusing on the larger group of KOA patients (n=94). Pain  
423 intensity-related subscales were not included in this analysis, as they are the outcome measures  
424 to be modeled by PCA results. The correlations, organized by PCA results, are presented in **Figure**  
425 **4a**. PCA identified 5 orthogonal components with eigenvalues>1.0, altogether explaining 69.9%  
426 of the variance. Given the observed loadings, we labeled them as: 1) *Affect*, composed of anxiety  
427 and depression subscales of HADS; 2) *Pain Catastrophizing*, its highest factor loadings were the  
428 three maladaptive dimensions rumination, magnification and helplessness of PCS; 3) *Pain*  
429 *Quality*, dominated by the MPQ-sensory subscale and DN4, with high loadings regarding knee  
430 symptoms, knee related quality of life and sports and recreational ability; 4) *Health*, which was



431 dominated by the SF-36 measures that quantify health status and health related quality of life;  
432 5) *Physical Performance*, included high negative loading for 6MWT and high positive loading for  
433 TUG (**Figure 4b**). Note the five factors approximate the distinct domains surveyed by the  
434 questionnaires and tasks: HADS, KOOS, PCS, SF-36, and the combination of TUG and 6MWT.  
435 These five factors were used in subsequent model building to predict pain and residual pain.

436

437 **Figure 4. Principal component analysis identified five factors characterizing baseline KOA.** Pain-  
438 and affect-related questionnaires, their subscales, and performance measures (prior to surgery)  
439 were examined together to identify dominant underlying factors. **a.** Correlation matrix ordered  
440 based on principal component analysis results (Pearson's  $r$  represented by color bar). The five  
441 identified components were labeled according to membership properties. **b.** Factor loadings are  
442 shown for the five components. 6MWT, six minute walking test; DN4, The Neuropathic Pain 4  
443 questions; HADS(A), The Hospital Anxiety and Depression Scale, Anxiety; HADS(D), The  
444 Hospital Anxiety and Depression Scale, Depression; KOOS, Knee Injury and Osteoarthritis  
445 Outcome Score, (ADL – Function in daily living), (S -Knee Symptoms), (SR – Function in sport and  
446 recreation), (QOL – knee related quality of life); MPQ, McGill Pain Questionnaire, (A – Affective  
447 score) (S – Sensory score); PCS, Pain Catastrophizing Scale, (R – Rumination subscale), (M –  
448 Magnification subscale), (H – Helplessness subscale); SF36, Short-form (36) Health Survey, (PF –  
449 Physical Functioning), (PH – physical role functioning), (EP – emotional role functioning), (EF –  
450 energy/fatigue), (E – emotional well-being), (SF – social functioning), (GH – general health); TUG,  
451 Timed -up and go test.

452

### 453 **3.5 Modelling pain and TJR pain outcomes in OA**

454

455 Next, we sought to model OA pain, using multi-factorial regressions (including only parameters  
456 that survived both forward and backward elimination), both at baseline and after surgery.  
457 Independent variables entered in our models are the five factors from the PCA results, together  
458 with relevant clinical/demographic variables: age, gender, educational level, body mass index,  
459 pain duration, and radiographic severity of OA.

460

461 **3.5.1 Pre-surgery KOA pain is defined by its quality, across pain measures**

462

463 Pre-surgery KOA pain could be successfully modeled for all four outcome measures (**Table 3**). All  
 464 models reached statistical significance and accounted for 22-57% of variances of pain intensity.  
 465 Pain quality emerged as the common dominant factor accounting for higher pain intensity  
 466 throughout all scales. For NRS it was the only factor present in the model, whereas for the other  
 467 3 outcomes, additional factors were identified. BPI severity was predicted by higher levels of Pain  
 468 Catastrophizing, KOOS Pain by worse Physical Performance, and SF-36 pain by worse Health  
 469 Status.

470

471 **Table 3. Multiple regression models for KOA pain intensity at baseline for four different pain**  
 472 **intensity measures.**

| Model                    | b      | SE    | $\beta$ | t      | p    | Adjusted R <sup>2</sup>  |
|--------------------------|--------|-------|---------|--------|------|--------------------------|
| <b>BPI Pain Severity</b> |        |       |         |        |      |                          |
| Pain Quality             | 2.526  | .670  | .385    | 3.770  | .000 | .275**<br>F(2,92)=18.816 |
| Pain Catastrophizing     | 1.430  | .639  | .229    | 2.239  | .028 |                          |
| <b>NRS</b>               |        |       |         |        |      |                          |
| Pain Quality             | 0.851  | 0.162 | 0.479   | 5.258  | .000 | .229**<br>F(1,93)=27.652 |
| <b>KOOS Pain</b>         |        |       |         |        |      |                          |
| Pain Quality             | 11.499 | 1.126 | .713    | 10.216 | .000 | .573**<br>F(1,92)=63.379 |
| Physical Performance     | 2.426  | 1.123 | .151    | 2.160  | .033 |                          |
| <b>SF36 Pain</b>         |        |       |         |        |      |                          |
| Health                   | 10.553 | 1.514 | .602    | 6.970  | .000 | .513**<br>F(2,92)=50.504 |
| Pain Quality             | 3.438  | 1.573 | .189    | 2.186  | .031 |                          |

473 KOA baseline pain intensity was explained by different pain-related characteristics, depending on  
 474 the questionnaire used to capture pain intensity. While the pain quality factor was incorporated  
 475 in all four regression models, additional unique influences were also identified for three of the

476 four pain intensity scales. Displayed statistics are from the final step of each model. **b**,  
477 unstandardized regression coefficient; **SE**, standard error;  **$\beta$** , standardized regression coefficient;  
478 **F**, obtained F-value; **t**, obtained t-value; **R<sup>2</sup>**, proportion of variance explained. \*  $p \leq 0.05$ , \*\* $p \leq$   
479 0.01. Displayed statistics are from the final step for each dependent variable. BPI Severity, Brief  
480 Pain Inventory Pain: severity subscale; HOOS Pain, Hip Injury and Osteoarthritis Outcome Score:  
481 pain subscale; NRS, Numeric Rating Scale; SF36 Pain, Short-form (36) Health Survey: pain  
482 subscale.

483

### 484 3.5.2 Models predicting pain intensity and residual pain after surgery in KOA

485

486 Next, we sought to model absolute pain intensity after surgery and residual pain (reflecting within  
487 subject change from pre-surgery) for all four pain measures, using the parameters collected prior  
488 to surgery, thus searching for pre-surgery influences on post-surgical pain. Modeling was  
489 restricted to pain at 6 months post-surgery, since there were minimal differences between post-  
490 surgery pain at 3 and 6 months.

491 Results, (**Table 4**) demonstrated that only three of the four outcome measures for absolute post-  
492 surgical pain could be modeled, accounting for 0-24% of the variance, and obtained models were  
493 distinct for each pain measure. We obtained similar results when modeling residual pain 6  
494 months post-surgery. Only three of the four pain measures could be modeled, accounting for  
495 even smaller 0-11% of the variance, and obtained models were distinct for each outcome  
496 measure, as well as from the models obtained for post-surgical pain. Note that obtained results  
497 seem paradoxical. Correlations between the four pain outcome measures increases post-surgery  
498 yet obtained, pre-surgery based, models diverge from each other, both for pain and for residual  
499 pain.

500

501 **Table 4. Multiple regression models for post-surgical KOA pain intensity, and for percentage residual**  
502 **pain at 6-months post-surgery, for four different pain intensity measures.**

| Post-surgical Pain Intensity |   |    |         |   |   |                         |
|------------------------------|---|----|---------|---|---|-------------------------|
| Model                        | b | SE | $\beta$ | t | p | Adjusted R <sup>2</sup> |

| <b>BPI Pain Severity</b>                                    |        |       |         |       |       |                          |
|-------------------------------------------------------------|--------|-------|---------|-------|-------|--------------------------|
| Affect                                                      | 2.845  | .670  | .408    | 4.246 | .000  |                          |
| Pain Duration                                               | .277   | .096  | .278    | 2.893 | .005  |                          |
|                                                             |        |       |         |       |       | .238**<br>F(2,82)=13.952 |
| <b>NRS</b>                                                  |        |       |         |       |       |                          |
| No predictive model – no variables entered in the equation. |        |       |         |       |       |                          |
| <b>KOOS Pain</b>                                            |        |       |         |       |       |                          |
| Affect                                                      | 5.688  | 2.229 | .284    | 2.522 | .013  |                          |
| Gender                                                      | 9.756  | 4.320 | .221    | 2.259 | .027  |                          |
| Health                                                      | 4.246  | 2.026 | .231    | 2.060 | .043  |                          |
|                                                             |        |       |         |       |       | .234**<br>F(3,81)=9.338  |
| <b>SF36 Pain</b>                                            |        |       |         |       |       |                          |
| Health                                                      | 7.032  | 2.292 | .310    | 3.068 | .003  |                          |
| Gender                                                      | 15.176 | 5.520 | .278    | 2.749 | .007  |                          |
|                                                             |        |       |         |       |       | .196*<br>F(2,82)=9.730   |
| <b>% Residual Pain</b>                                      |        |       |         |       |       |                          |
| Model                                                       | b      | SE    | $\beta$ | t     | p     | Adjusted R <sup>2</sup>  |
| <b>BPI Pain Severity</b>                                    |        |       |         |       |       |                          |
| Pain Duration                                               | 1.413  | .536  | .274    | 2.635 | .01   |                          |
| Health                                                      | 7.681  | 3.451 | .232    | 2.226 | 0.029 |                          |
|                                                             |        |       |         |       |       | .114**<br>F(2,82)=6.267  |
| <b>NRS</b>                                                  |        |       |         |       |       |                          |
| No predictive model – no variables entered in the equation. |        |       |         |       |       |                          |
| <b>KOOS Pain</b>                                            |        |       |         |       |       |                          |
| Physical Performance                                        | 9.276  | 3.036 | .321    | 3.055 | .003  |                          |
|                                                             |        |       |         |       |       | .092**<br>F(1,83)=9.335  |
| <b>SF36 Pain</b>                                            |        |       |         |       |       |                          |
| Gender                                                      | 24.210 | 8.088 | .316    | 2.993 | .004  |                          |
|                                                             |        |       |         |       |       | .088**<br>F(1,83)=8.959  |

503 Different explanatory models were elicited for absolute versus relative (% residual pain) pain intensity  
504 after surgery, with the variance explained by each model being overall lower for % residual pain than that  
505 for absolute pain intensity. Again, explanatory variables were also distinct considering the four different  
506 outcome measures.

507 **b**, unstandardized regression coefficient; **SE**, standard error;  **$\beta$** , standardized regression coefficient; **F**,  
508 obtain F-value; **t**, obtained t-value; **R<sup>2</sup>**, proportion variance explained. Gender: male coded as 0, female  
509 coded as 1. \*  $p \leq 0.05$ , \*\* $p \leq 0.01$ . Displayed statistics are from the final step for each dependent variable.

510 BPI Severity, Brief Pain Inventory Pain: severity subscale; HOOS Pain, Hip Injury and Osteoarthritis  
511 Outcome Score: pain subscale; NRS, Numeric Rating Scale; SF36 Pain, Short-form (36) Health Survey: pain  
512 subscale.

513

### 514 **3.5.3 Do KOA models of pain and residual pain generalize to HOA?**

515

516 Given the smaller data available in HOA (n=22), and the large number of independent variables  
517 and four pain outcome measures, we limited HOA modeling. We only tested the extent to which  
518 models obtained in KOA are shared with HOA. Therefore, regression models were constructed  
519 for HOA pre-surgical pain, 6-months absolute post-surgical pain and residual pain using only  
520 parameters identified for KOA. Pre-surgery, the multiple regression successfully modeled pain  
521 intensity for HOOS Pain (equivalent to KOOS pain),  $F(2,22) = 24.308$ ,  $p < 0.005$ , however only one  
522 of the two variables entered, Pain Quality, was significant ( $\beta = .764$ ,  $p = 0.005$ ). For SF-36 pain, the  
523 model obtained for KOA was also applicable,  $F(2,22) = 23.55$ ,  $p < 0.001$ . Here the factor Health  
524 ( $\beta = .732$ ,  $p < 0.001$ ), but not Pain Quality was significant. NRS and BPI in HOA failed to be modeled  
525 by the HOA parameters.

526 The results show that pain and residual pain for HOA after surgery, failed to be modeled by KOA  
527 parameters, for any of the four pain scales.

528

### 529 **3.6 A composite measure of pain intensity**

530

531 As the pre-surgical parameters predicting post-surgical pain or residual pain for four pain  
532 outcome measures captured distinct independent variables and given that the four outcome  
533 measures show somewhat distinct properties as well as post-surgical responses, we reasoned  
534 that each may be reflecting specific characteristics and thus combining all four measures would  
535 predict larger variance and incorporate the common components. Therefore, we constructed the  
536 composite, average score, of all four pain outcome measures and studied its properties. Similar  
537 to the trend set by the unitary scales, aggregated pain intensity levels were similar between OA  
538 groups pre-surgery (mean of ~6, 0-10 scale), decreased after surgery (~2-1), to a greater extent  
539 for hip than for knee, and was stable between 3 and 6 months (**Figure 5a**). The distribution of

540 residual pain with the aggregate measure again highlighted better surgical outcomes in HOA:  
 541 74% of KOA patients reported at least 20% reduction of the initial pain, but only 46% of HOA. The  
 542 number of patients sustaining higher pain levels decreases for both OA groups, more dramatically  
 543 for hip than for knee OA (**Figure 5b**).

544 Next we tested how pre-surgical factors predict 6-months post-surgical KOA pain, using our  
 545 aggregate measure (**Table 5**), again modeling pain and residual pain for KOA patients. For post-  
 546 surgical aggregated pain severity, the model explained 19% of the variance and included worse  
 547 health state, lower degree of structural articular damage, and poor results in the physical  
 548 performance tests. For residual pain, the model explained 7% of the variance and Physical  
 549 Performance was the only predictive factor. Using these variables to predict HOA post-surgical  
 550 pain and residual pain we could not find any statistically significant models.

551  
 552 **Figure 5. Composite pain intensity variable defined severity, and residual pain after surgery.**  
 553 Aggregated variable of pain intensity created by averaging the four pain outcome measures. **a)** -  
 554 Pain intensity for KOA (blue) and HOA (red) at baseline, and at 3 and 6 months after surgery.  
 555 There was an interaction between condition (KOA and HOA) and time on the levels of pain  
 556 intensity (two-way mixed ANOVA,  $F(2,208) = 3.67, p = 0.03$ ). Pain intensity after surgery was higher  
 557 for KOA, both at 3 months ( $F(104) = 17.65, p < 0.001$ ) and 6 months ( $F(104) = 10.037, p < 0.001$ ).  
 558 For each bar, circles represent the mean value, and bars indicate standard deviation. **b)** The bar  
 559 graph depicts the percentage of patients (%) at each category of extent of residual pain at 6  
 560 months post-surgery. KOA patients sustain higher levels of pain relative to HOA (20%:  $\chi^2(1) = 6.43,$   
 561  $p = 0.011$ ; 40%:  $\chi^2(1) = 4.71, p = 0.03$ ; 60%:  $\chi^2(1) = 3.88, p = 0.049$ ). \*\* $p < 0.01$ ; \* $p < 0.05$ .

562  
 563  
 564 **Table 5. Multiple regression analysis for KOA pain intensity and % residual pain at 6-months**  
 565 **post-surgery, using our aggregated variable for pain intensity (average of four pain intensity**  
 566 **questionnaire measures).**

| Model                     | b | SE | $\beta$ | t | p | Adjusted R <sup>2</sup> |
|---------------------------|---|----|---------|---|---|-------------------------|
| <b>Post-surgical Pain</b> |   |    |         |   |   |                         |

| Health                   | .374  | .161  | .241  | 2.328  | .022 |                |
|--------------------------|-------|-------|-------|--------|------|----------------|
| Kellgreen-Lawrence Scale | -.408 | .169  | -.213 | -2.416 | .017 |                |
| Physical Performance     | .365  | .176  | .215  | 2.067  | .041 |                |
|                          |       |       |       |        |      | .192**         |
|                          |       |       |       |        |      | F (3,81)=9.313 |
| % Residual Pain          |       |       |       |        |      |                |
| Physical Performance     | 7.457 | 2.708 | .291  | 2.754  | .007 |                |
|                          |       |       |       |        |      | .073**         |
|                          |       |       |       |        |      | F (3,81)=7.584 |

567  
 568 Prediction models of our aggregate pain intensity measure show differences across absolute and  
 569 relative measures (% residual pain). Physical performance was a common predictive factor of  
 570 both measures. **b**, unstandardized regression coefficient; **SE** standard error; **β**, standardized  
 571 regression coefficient; **F**, obtain F-value; **t**, obtained t-value; **R<sup>2</sup>**, proportion variance explained.  
 572 All statistics are from the final step of the model. \*\*p ≤ 0.01.

573

574

### 575 3.7 Network analysis of pain dimensions

576

577 An alternative to regression-based modeling of the effects of TJR on OA pain is to examine  
 578 properties of the correlation matrix identified pre-surgery (**Figure 4**) as a function of type of OA  
 579 and time from surgery. Representing such correlation matrices as networks provides insights  
 580 regarding organizational topography and changes in the inter-relationships between pain  
 581 characteristics that define the OA state, as the variations in individual factor weights can be  
 582 considered to define the OA-pain personality profile of such patients. Therefore, we calculated  
 583 these networks pre-surgery, and three- and six-months post-surgery (**Figure 6**).

584 Regarding the pre-surgery KOA network, factors Affect, Pain Catastrophizing and Health  
 585 presented salient edges (significantly high correlations) among them. Pain Quality showed a  
 586 lower number of edges connecting with other factors (only through subscale KOOS-ADL). Physical  
 587 performance was segregated from the other factors. For HOA, Affect and Pain Catastrophizing  
 588 did not share any salient correlations. Pain Quality was highly correlated to Health and to a lesser  
 589 extent to Pain Catastrophism. Physical performance was again segregated.

590 At six months after surgery topological differences were identified in both KOA and HOA groups.  
591 For the KOA network, Affect and Pain Catastrophizing no longer presented salient edges. Pain  
592 quality shared a higher number of edges with Affect and Health. Physical Performance continued  
593 to be isolated, sharing no edges with other components. For HOA, Pain Catastrophizing lost its  
594 prominent edges with Health and was only linked with Pain Quality. Physical Performance  
595 showed links with one variable in Pain Quality (HOOS Sports and Recreational) (**Figure 6a**).

596 To quantify topological changes in these network architectures we derived network measures  
597 and compared them between groups and as a function of time. We calculated change in strength  
598 of connectivity (change in correlation coefficients for all pairs of subscales,  $\Delta r$ -value) both for 3-  
599 and 6-months post-surgery. For further comparison intra- and inter-groups, we computed  
600 statistical probability using 10,000 permutations with random resampling.

601 Inside each group, there was a significant change in  $\Delta r$ -value, for both KOA and HOA, at 3 and 6  
602 months, with no differences between 3 and 6 months in each group, indicating that post-surgical  
603 connectivity is stable in time. When comparing between KOA and HOA groups, connectivity  
604 change was larger for HOA both at 3 and 6 months (**Figure 6b**).

605 Lastly, we evaluated the clustering coefficient and modularity of the networks and assessed  
606 differences between groups. For both measures, KOA networks remained stable after treatment.  
607 HOA, on the other side, showed a significant change in both measures, from baseline to 3 and 6  
608 months. From 3 to 6 months the networks remained stable (**Figure 6c**).

609 Overall, we observed that pain characterizing networks for KOA and HOA are quite distinct from  
610 each other prior to surgery while displaying similar topology, and only the HOA network is  
611 significantly reorganized post-surgery.

612

613 **Figure 6. Network representation of OA pain characteristics.** a) Network graphs depict  
614 interrelations between clinical and pain-related questionnaire subscale measures at baseline,  
615 and at 6 months post-surgery, for KOA and HOA patients. Network communities were derived  
616 from the PCA analysis. Links represent the top 25% correlations of each network. b) The bar graph  
617 displays mean change of global correlation coefficients (Pearson's  $\Delta r$ ) for KOA and HOA, at 3- and  
618 6-months post-surgery. Both groups had significant change in the overall interrelations between



619 clinical and pain-related characteristics (KOA mean  $\Delta r$  3months: 0.14,  $t=13.37$ , mean  $\Delta r$  6months:  
620 0.16  $t=14.93$ , HOA mean  $\Delta r$  3months:0.28,  $t=8.72$ , mean  $\Delta r$  6months:0.26  $t=9.23$ ,  $p<0.001$ ). The  
621 extent of change remained stable from 3 to 6 months post-surgery and was substantially higher  
622 in the HOA group at 3 months ( $t=4.62$ ,  $p<0.001$ ) and 6 months ( $t=3.44$ ,  $p<0.001$ ). **c)** Graph theory-  
623 based modularity and mean clustering coefficients for correlation networks at baseline, 3 and 6  
624 months. The HOA networks shows significant topological reorganization 3 months (mcc:  $t=-8.19$ ,  
625 modularity:  $t=-9.22$ ,  $p<0.001$ ) and 6 months after surgery (mcc,  $t=-10.62$ , modularity,  $t=-9.02$ ,  
626  $p<0.001$ ), while KOA remains stable. BL, baseline; 3m, 3 months; 6m, 6 months; Statistical risk  
627 probability was computed under 10.000 times repeated random resampling. **\*\*** $p<0.001$ ,  
628 **\*** $p<0.05$ .

629

## 630 **Discussion**

631 This study examined KOA and HOA pain prior and after TJR surgery. We used a systematic and  
632 structured approach, together with data reduction techniques, to investigate the properties of  
633 OA pain, its change with surgery, and factors that influence post-surgical OA pain. By using four  
634 distinct pain intensity quantifying measures, two distinct types of joint OA, and measures  
635 collected at pre-, 3, and 6 months post-surgery, we examined the contribution of a large number  
636 of potential influences, many of which have been reported to be risk factors for OA pain  
637 persistence post-TJR. As available data were larger for KOA, we performed model building in this  
638 group and tested identified variables in HOA. Each of the four-pain intensity measures we used,  
639 either alone or their aggregate, demonstrated an overall decrease in OA pain after surgery in  
640 both OA groups. For HOA, these decreases were at least twice as large and in a larger proportion  
641 of patients, as residual pain  $>60\%$  was observed only in 18% of KOA and 0% of HOA. A striking  
642 and perhaps unexpected result was how little OA pain changed from 3- to 6-months post-surgery  
643 in both groups. Neither the mean pain nor pain characteristics, as assessed by network  
644 properties, showed any important changes over this time period, although large changes were  
645 seen between pre-surgery and 3-months post-surgery. Our regression models showed that  
646 commonly assessed clinical and behavioral measures prior to surgery fail to reliably predict pain  
647 outcomes in knee and hip OA patients.

648 OA pain and persistent pain after TJR have been previously studied using multiple pain outcome  
649 scales. These can be divided in two major groups, general measures such as NRS, visual analog  
650 scale [32], SF-36 bodily pain and BPI pain severity, and OA specific measures as Western Ontario  
651 and McMaster Universities Osteoarthritis Index (WOMAC), KOOS/HOOS pain score and the  
652 Oxford Knee Score pain subscale [7, 33]. Such studies suggest that different pain outcomes relate  
653 to different facets of the pain experience in knee OA [34]. Using four different pain intensity  
654 outcomes, three of them from the category of general pain scales and one specific for OA  
655 (HOOS/KOOS), our results show that although correlations between these measures are positive  
656 and mostly significant (both at baseline and post-surgery), BPI pain severity tends to  
657 underestimate pain intensity and SF-36 pain tends to overrate pain intensity after surgery, both  
658 in KOA and HOA groups. Still, all four measures decreased 3-months post-surgery, and all  
659 remained unchanged between 3- and 6-months post-surgery.

660 Pain outcomes concerning persistency are commonly studied using primarily the absolute value  
661 of pain intensity after surgery, or dichotomizing the outcome using a fixed threshold that varies  
662 across studies [35-38]. Such approaches assume that the treatment has a constant effect. A  
663 change may show the health improvement in a more observable way. Here we chose to use both  
664 change (residual pain) and absolute value of pain. Both measures showed independence or  
665 minimal and inconsistent dependence on baseline values, implying pain relief post-surgery does  
666 not depend or inconsistently depend on entry scores.

667 An important remark concerning post-surgical pain and its risk prediction is that it relies on how  
668 it is defined and thus also on how one measures the pain outcomes. Chronic post-surgical pain is  
669 accepted as the pain that persists at least three months after surgery, different in characteristics  
670 from pre-operative pain, and- without other causes such as infection or technical failure [5]. Our  
671 results are generally consistent with this definition and further advance the concept. Firstly, we  
672 observe that models characterizing OA pain at baseline do not generalize to pain post-surgery.  
673 Second, the amount of variance explained with the regression models for pain intensity  
674 decreased from pre-surgery (accounting for 23-57% of pain intensity variance), to post-surgery  
675 (accounting for 20-24% of variance), and further decreased when modeling residual pain  
676 (accounting for 9-11% of variance). Given that residual pain is a more direct measure of the

677 influence of the surgical intervention than the absolute value of pain intensity, our models at best  
678 could only explain 11% of the variance of the surgery related OA pain. Importantly, the models  
679 obtained for residual pain for each pain measure could not be replicated when modeling the  
680 aggregated measure, again attesting that these models are weak and inconsistent. Third, studies  
681 report that pre-operative OA pain intensity has a strong influence on post-surgical outcomes [7].  
682 It was recently argued that the evidence for this influence is of low-quality, even when studied in  
683 much larger number of OA patients [9], and our results support the failure of pre-operative pain  
684 as a predictor of post-surgical outcomes. Fourth, the network analysis shows large changes in the  
685 interrelationships between pain related characteristics post-surgery. Thus, our analysis,  
686 especially for KOA where we examined multiple models, suggests that the post-operative pain is  
687 minimally related to the pre-operative pain properties. Our results in HOA, although not as  
688 strong, are also consistent with this notion.

689 Given the small sample size in HOA, we limited the models and statistical tests in this group.  
690 Models derived from KOA did not generalize to HOA. Thus, HOA pain models remain to be studied  
691 in larger data sets in the future, and with additional parameters not included here. However, our  
692 results repeatedly confirm that pain relief is better in this group and this is accompanied with  
693 larger changes in the network properties. We observed larger changes in clustering coefficient  
694 and in modularity in HOA, implying that the pain personality in HOA is being fractured with pain  
695 relief, rendering different factors independent from each other. These findings are all consistent  
696 with earlier reports showing that the improvement in pain and physical function after  
697 arthroplasty is greater for hip than knee OA [3], even though symptomatic presentation of HOA  
698 is associated with more advanced radiological disease [39]. Determinants for persistent pain after  
699 THR are less studied, and evidence is limited and conflicting [40]. The full scope of the differences  
700 in TJR outcomes between both conditions requires further studies.

701 The primary focus of this paper was to find predictors for pain and pain persistency, and although  
702 we show that there is a high variability concerning scales and outcome definitions, some of the  
703 findings deserve further discussion. At baseline, we observed that across the four scales and the  
704 aggregated pain measure, Pain Quality (constituted mainly by neuropathic pain profile and  
705 sensory quality of MPQ) related to higher pain intensity. When we modelled residual pain after

706 surgery, each scale unveiled different predictors. No homogeneous result could be retrieved. For  
707 our aggregated variable, residual pain could be predicted by a different parameter, while the  
708 expectation was that this aggregated measure would capture larger variance for the same  
709 factors. Even though a previous study has reported that worse pre-operative functional status  
710 was related to pain persistency [41] the present results do not confirm the role of pre-operative  
711 walking ability on post-operative KOA pain.

712 It has been reported that the greatest improvement in patients undergoing TJR happens in the  
713 first 3 months after surgery [3]. Although a precise timeline for pain recovery is difficult to draw,  
714 our results support the finding that pain persistence at 3 months should be regarded as critical  
715 evidence for longer-term persistence of post-surgical pain.

716 An important weakness of the present study was the imbalance of available data between KOA  
717 and HOA. Moreover, there were important demographic differences between the two groups  
718 which could not be corrected for due to the limited available sample in HOA. Thus, we cannot  
719 rule out the influence of these factors on the models derived from KOA and tested in HOA. The  
720 total number of subjects included in this study is relatively small, however not a limitation for the  
721 statistical modelling applied. It is possible that in larger samples stronger statistical relationships  
722 may be uncovered between presurgical clinical measures and post-TJR pain. However, such the  
723 literature where larger groups of subjects were studied again indicate that these relationships  
724 are small in magnitude and thus of minimal biological interest [9]. Regarding our sample  
725 characteristics, patients were enrolled in the same center, and the population included is  
726 ethnically homogeneous, thus caution is needed in generalizing the present's study results to  
727 other populations. The follow-up time was limited to 6 months, what can also be regarded as a  
728 limitation. We also did not collect multiple measures that in the literature have been suggested  
729 to influence both baseline pain and post-surgical pain. For instance, measures of widespread  
730 hypersensitivity, temporal summation of pain and impaired endogenous pain inhibition assessed  
731 by quantitative sensory testing, have been suggested to contribute to poor pain relief following  
732 TKR [42, 43], however see [44]. It was also previously shown that OA patients present central  
733 nervous system structural and functional maladaptive changes [45, 46]. We will test the latter  
734 concept in this same group of participants using their brain imaging results.

735 In conclusion, our results show distinct pain scales relate to different aspects of the pain  
736 experience. Post-surgery residual pain scores show primarily independence from baseline pain.  
737 There is a reorganization of pain related biopsychosocial parameters that define the OA  
738 personality, and this change seems more profound in knee OA where pain relief is also larger.

### 739 **Acknowledgments**

740 We thank to Dr. Paulo Oliveira, for the clinical support and supervision of patients enrolled in the  
741 study and all the members of the Orthopedic Department of Centro Hospitalar Universitário de  
742 São João, Porto, for their support with data collection. Dr. Lina Melão and Dr. Patricia Leitão for  
743 the assistance in the radiographic classification. We are thankful to all Apkarian lab and Galhardo  
744 lab members that contributed to this study with their time and resources.

745

- 746 1. Neogi, T., *The epidemiology and impact of pain in osteoarthritis*. *Osteoarthritis Cartilage*,  
747 2013. **21**(9): p. 1145-53.
- 748 2. Finan, P.H., et al., *Discordance between pain and radiographic severity in knee*  
749 *osteoarthritis: findings from quantitative sensory testing of central sensitization*. *Arthritis*  
750 *Rheum*, 2013. **65**(2): p. 363-72.
- 751 3. Bachmeier, C.J., et al., *A comparison of outcomes in osteoarthritis patients undergoing*  
752 *total hip and knee replacement surgery*. *Osteoarthritis Cartilage*, 2001. **9**(2): p. 137-46.
- 753 4. Beswick, A.D., et al., *What proportion of patients report long-term pain after total hip or*  
754 *knee replacement for osteoarthritis? A systematic review of prospective studies in*  
755 *unselected patients*. *BMJ Open*, 2012. **2**(1): p. e000435.
- 756 5. Werner, M.U. and U.E. Kongsgaard, *I. Defining persistent post-surgical pain: is an update*  
757 *required?* *Br J Anaesth*, 2014. **113**(1): p. 1-4.
- 758 6. Erlenwein, J., et al., *Clinical relevance of persistent postoperative pain after total hip*  
759 *replacement - a prospective observational cohort study*. *J Pain Res*, 2017. **10**: p. 2183-  
760 2193.
- 761 7. Lewis, G.N., et al., *Predictors of persistent pain after total knee arthroplasty: a systematic*  
762 *review and meta-analysis*. *Br J Anaesth*, 2015. **114**(4): p. 551-61.
- 763 8. Baert, I.A., et al., *Does pre-surgical central modulation of pain influence outcome after*  
764 *total knee replacement? A systematic review*. *Osteoarthritis Cartilage*, 2016. **24**(2): p. 213-  
765 23.
- 766 9. Harmelink, K.E.M., et al., *Are There Prognostic Factors for One-Year Outcome After Total*  
767 *Knee Arthroplasty? A Systematic Review*. *J Arthroplasty*, 2017. **32**(12): p. 3840-3853 e1.
- 768 10. Harden, R.N., et al., *Medication Quantification Scale Version III: update in medication*  
769 *classes and revised detriment weights by survey of American Pain Society Physicians*. *J*  
770 *Pain*, 2005. **6**(6): p. 364-71.

- 771 11. Podsiadlo, D. and S. Richardson, *The timed "Up & Go": a test of basic functional mobility*  
772 *for frail elderly persons*. J Am Geriatr Soc, 1991. **39**(2): p. 142-8.
- 773 12. Balke, B., *A Simple Field Test for the Assessment of Physical Fitness*. Rep 63-6. Rep Civ  
774 Aeromed Res Inst US, 1963: p. 1-8.
- 775 13. Rejeski, W.J., et al., *Assessing performance-related disability in patients with knee*  
776 *osteoarthritis*. Osteoarthritis Cartilage, 1995. **3**(3): p. 157-67.
- 777 14. Kennedy, D.M., et al., *Assessing stability and change of four performance measures: a*  
778 *longitudinal study evaluating outcome following total hip and knee arthroplasty*. BMC  
779 Musculoskelet Disord, 2005. **6**: p. 3.
- 780 15. Dobson, F., et al., *OARSI recommended performance-based tests to assess physical*  
781 *function in people diagnosed with hip or knee osteoarthritis*. Osteoarthritis Cartilage,  
782 2013. **21**(8): p. 1042-52.
- 783 16. Kellgren, J.H. and J.S. Lawrence, *Radiological assessment of osteo-arthrosis*. Ann Rheum  
784 Dis, 1957. **16**(4): p. 494-502.
- 785 17. Roos, E.M. and S. Toksvig-Larsen, *Knee injury and Osteoarthritis Outcome Score (KOOS) -*  
786 *validation and comparison to the WOMAC in total knee replacement*. Health Qual Life  
787 Outcomes, 2003. **1**: p. 17.
- 788 18. Goncalves, R.S., et al., *Cross-cultural adaptation and validation of the Portuguese version*  
789 *of the Knee injury and Osteoarthritis Outcome Score (KOOS)*. Osteoarthritis Cartilage,  
790 2009. **17**(9): p. 1156-62.
- 791 19. Nilsson, A.K., et al., *Hip disability and osteoarthritis outcome score (HOOS)--validity and*  
792 *responsiveness in total hip replacement*. BMC Musculoskelet Disord, 2003. **4**: p. 10.
- 793 20. Keller, S., et al., *Validity of the brief pain inventory for use in documenting the outcomes*  
794 *of patients with noncancer pain*. Clin J Pain, 2004. **20**(5): p. 309-18.
- 795 21. Daut, R.L., C.S. Cleeland, and R.C. Flanery, *Development of the Wisconsin Brief Pain*  
796 *Questionnaire to assess pain in cancer and other diseases*. Pain, 1983. **17**(2): p. 197-210.
- 797 22. Azevedo, L.C.P., A; Dias, C; Agualusa, L; Lemos, L; Romão, J; Patto, T; Vaz-Serra, S;  
798 Abrunhosa, R; Jorge C, C; Carlos C, M; Correia, D; Correia, J; Coucelo, G; Craveiro Lopes,  
799 B; do Céu Loureiro, M; Silva, B; Manuel Castro-Lopes, J. , (*Tradução, adaptação cultural e*  
800 *estudo multicêntrico de validação de instrumentos para rastreio e avaliação do impacto*  
801 *da dor crónica (Translation, cultural adaptation and multicentric validation study of*  
802 *chronic pain screening and impact assessment instruments)*. Dor, 2007. **15**: p. 6-65.
- 803 23. Melzack, R., *The McGill Pain Questionnaire: major properties and scoring methods*. Pain,  
804 1975. **1**(3): p. 277-99.
- 805 24. Byrne, M., et al., *Cross-validation of the factor structure of the McGill Pain Questionnaire*.  
806 Pain, 1982. **13**(2): p. 193-201.
- 807 25. Bouhassira, D., et al., *Comparison of pain syndromes associated with nervous or somatic*  
808 *lesions and development of a new neuropathic pain diagnostic questionnaire (DN4)*. Pain,  
809 2005. **114**(1-2): p. 29-36.
- 810 26. Zigmond, A.S. and R.P. Snaith, *The hospital anxiety and depression scale*. Acta Psychiatr  
811 Scand, 1983. **67**(6): p. 361-70.
- 812 27. Pais-Ribeiro, J., et al., *Validation study of a Portuguese version of the Hospital Anxiety and*  
813 *Depression Scale*. Psychol Health Med, 2007. **12**(2): p. 225-35; quiz 235-7.



- 814 28. Sullivan, M.J.L.B., S.R.; Pivik, J. , *The Pain Catastrophizing Scale: Development and*  
815 *validation*. Psychological Assessment, 1995. **7**: p. 524-532.
- 816 29. McHorney, C.A., J.E. Ware, Jr., and A.E. Raczek, *The MOS 36-Item Short-Form Health*  
817 *Survey (SF-36): II. Psychometric and clinical tests of validity in measuring physical and*  
818 *mental health constructs*. Med Care, 1993. **31**(3): p. 247-63.
- 819 30. Ferreira, P.L., *[Development of the Portuguese version of MOS SF-36. Part I. Cultural and*  
820 *linguistic adaptation]*. Acta Med Port, 2000. **13**(1-2): p. 55-66.
- 821 31. Rubinov, M. and O. Sporns, *Complex network measures of brain connectivity: uses and*  
822 *interpretations*. Neuroimage, 2010. **52**(3): p. 1059-69.
- 823 32. Romero-Garcia, R., et al., *Structural covariance networks are coupled to expression of*  
824 *genes enriched in supragranular layers of the human cortex*. Neuroimage, 2018. **171**: p.  
825 256-267.
- 826 33. Kim, D.H., et al., *Predictive Factors for Developing Chronic Pain After Total Knee*  
827 *Arthroplasty*. J Arthroplasty, 2018. **33**(11): p. 3372-3378.
- 828 34. Creamer, P., M. Lethbridge-Cejku, and M.C. Hochberg, *Determinants of pain severity in*  
829 *knee osteoarthritis: effect of demographic and psychosocial variables using 3 pain*  
830 *measures*. J Rheumatol, 1999. **26**(8): p. 1785-92.
- 831 35. Wyld, V., S. Dixon, and A.W. Blom, *The role of preoperative self-efficacy in predicting*  
832 *outcome after total knee replacement*. Musculoskeletal Care, 2012. **10**(2): p. 110-8.
- 833 36. Pinto, P.R., et al., *Risk factors for moderate and severe persistent pain in patients*  
834 *undergoing total knee and hip arthroplasty: a prospective predictive study*. PLoS One,  
835 2013. **8**(9): p. e73917.
- 836 37. Valdes, A.M., et al., *Inverse relationship between preoperative radiographic severity and*  
837 *postoperative pain in patients with osteoarthritis who have undergone total joint*  
838 *arthroplasty*. Semin Arthritis Rheum, 2012. **41**(4): p. 568-75.
- 839 38. Sullivan, M., et al., *The role of presurgical expectancies in predicting pain and function one*  
840 *year following total knee arthroplasty*. Pain, 2011. **152**(10): p. 2287-93.
- 841 39. Dabare, C., et al., *Differences in presentation, progression and rates of arthroplasty*  
842 *between hip and knee osteoarthritis: Observations from an osteoarthritis cohort study-a*  
843 *clear role for conservative management*. Int J Rheum Dis, 2017. **20**(10): p. 1350-1360.
- 844 40. Vissers, M.M., et al., *Psychological factors affecting the outcome of total hip and knee*  
845 *arthroplasty: a systematic review*. Semin Arthritis Rheum, 2012. **41**(4): p. 576-88.
- 846 41. Lenguerrand, E., et al., *Trajectories of Pain and Function after Primary Hip and Knee*  
847 *Arthroplasty: The ADAPT Cohort Study*. PLoS One, 2016. **11**(2): p. e0149306.
- 848 42. Petersen, K.K., et al., *Presurgical assessment of temporal summation of pain predicts the*  
849 *development of chronic postoperative pain 12 months after total knee replacement*. Pain,  
850 2015. **156**(1): p. 55-61.
- 851 43. Petersen, K.K., et al., *Preoperative pain mechanisms assessed by cuff algometry are*  
852 *associated with chronic postoperative pain relief after total knee replacement*. Pain, 2016.  
853 **157**(7): p. 1400-6.
- 854 44. Leung, Y.Y., et al., *Pre-operative pressure pain thresholds do not meaningfully explain*  
855 *satisfaction or improvement in pain after knee replacement: a cohort study*. Osteoarthritis  
856 Cartilage, 2019. **27**(1): p. 49-58.

- 857 45. Baliki, M.N., et al., *Brain morphological signatures for chronic pain*. PLoS One, 2011. **6**(10):  
858 p. e26010.
- 859 46. Baliki, M.N., et al., *Functional reorganization of the default mode network across chronic*  
860 *pain conditions*. PLoS One, 2014. **9**(9): p. e106133.
- 861
- 862
- 863
- 864
- 865
- 866
- 867
- 868
- 869
- 870
- 871
- 872
- 873



**a**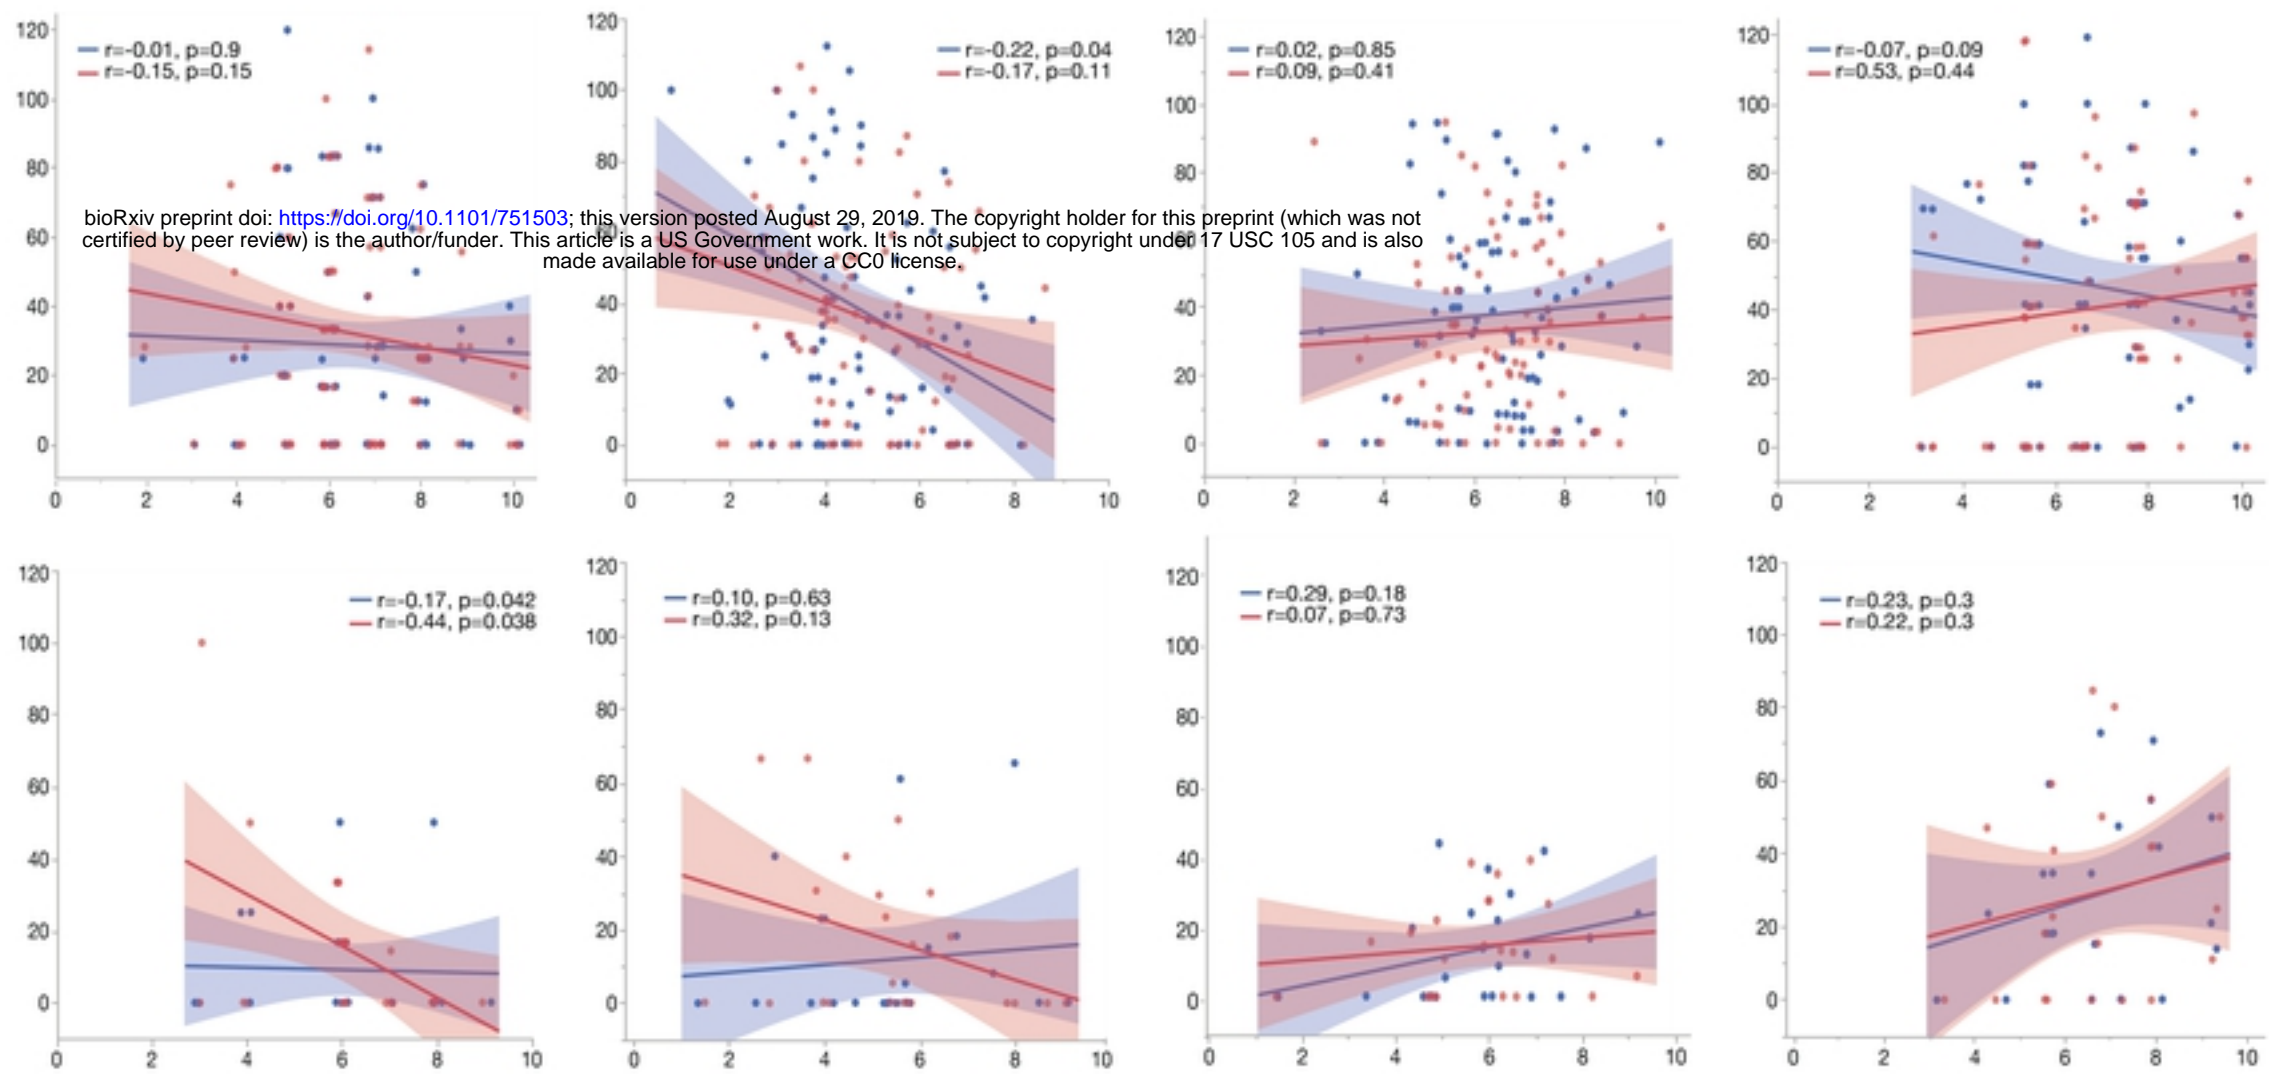**b**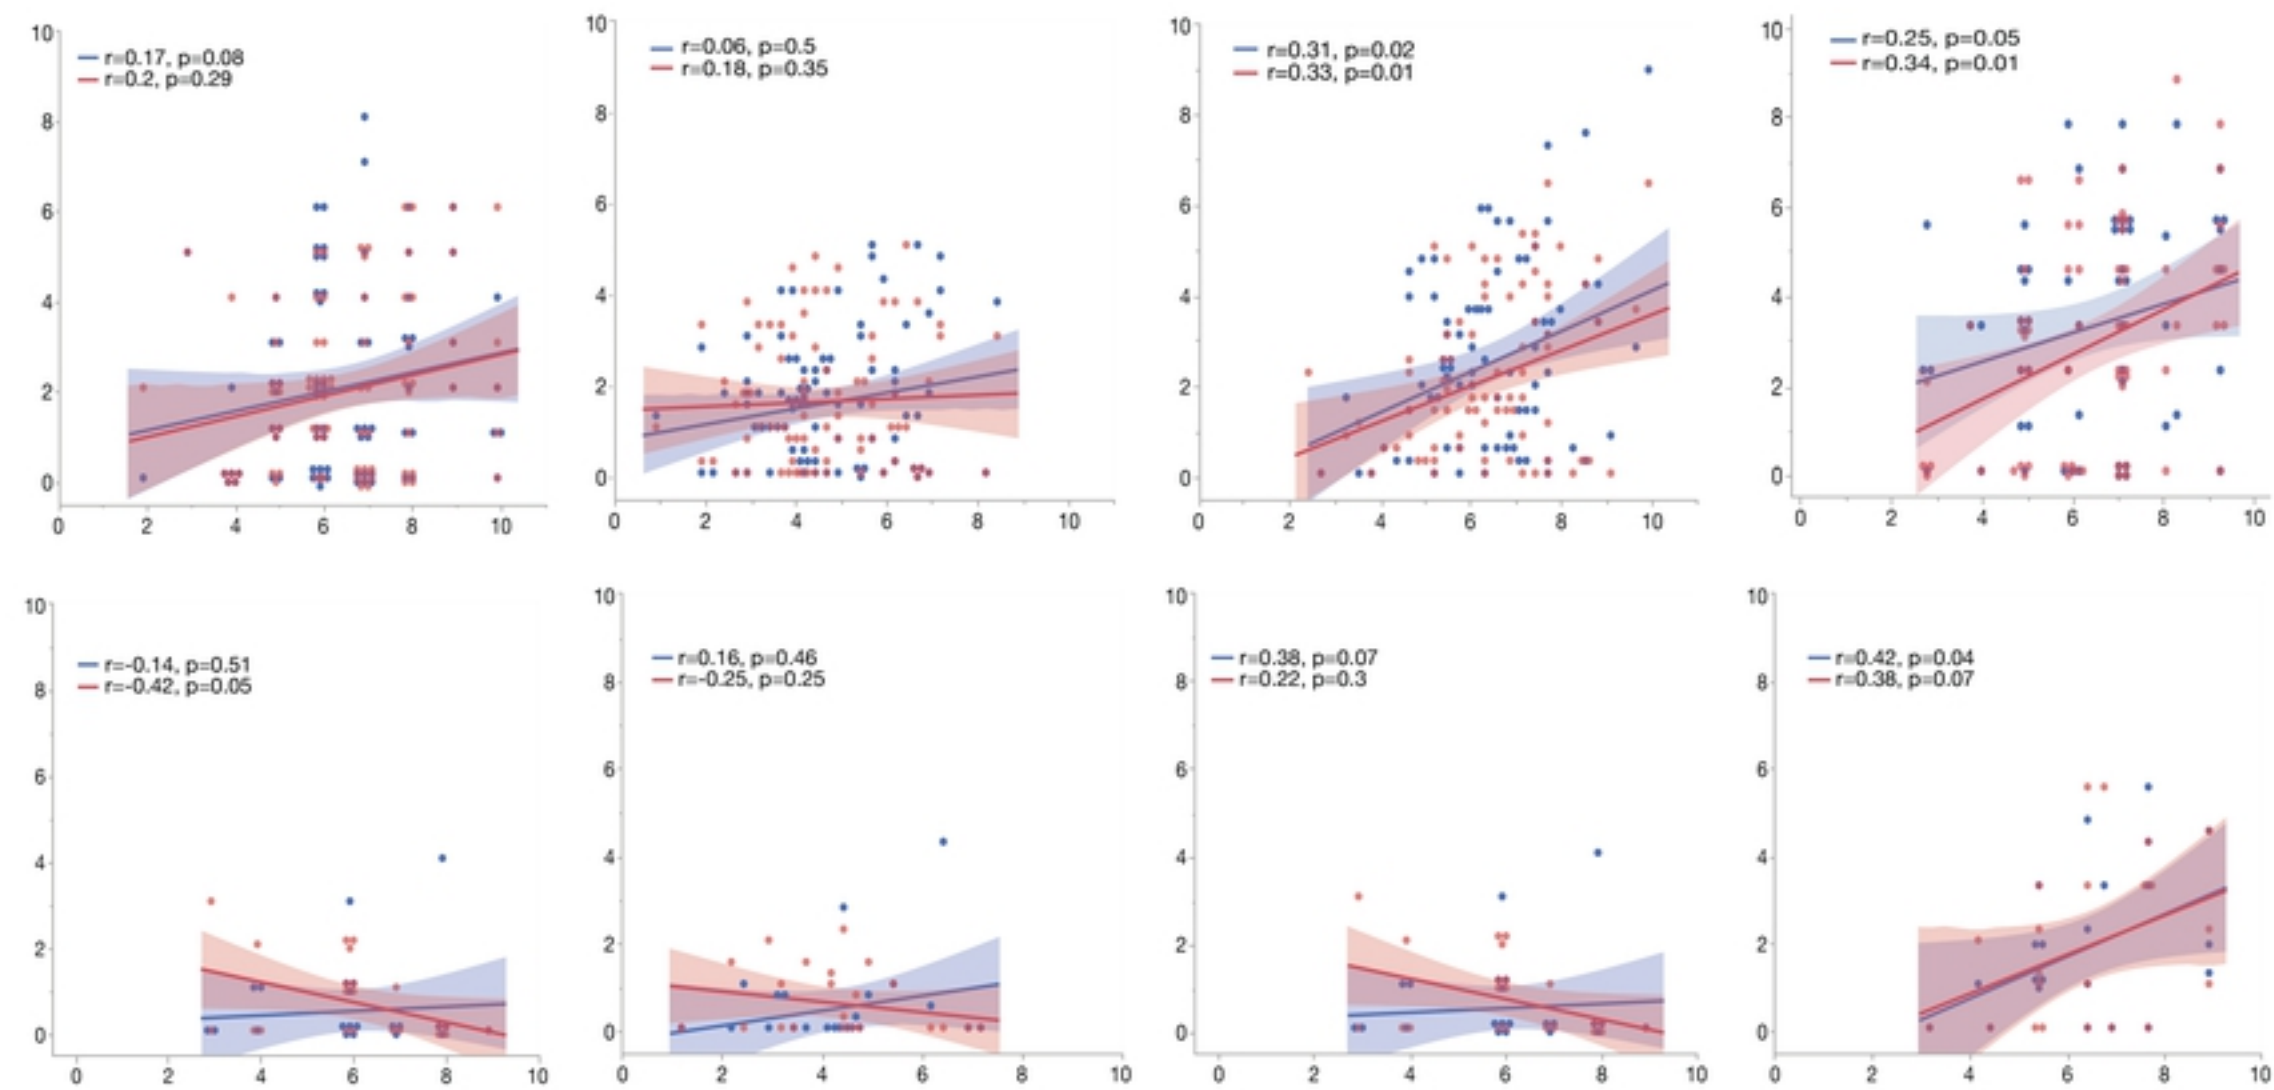

% Residual Pain - 3Mo

% Residual Pain - 6Mo

a

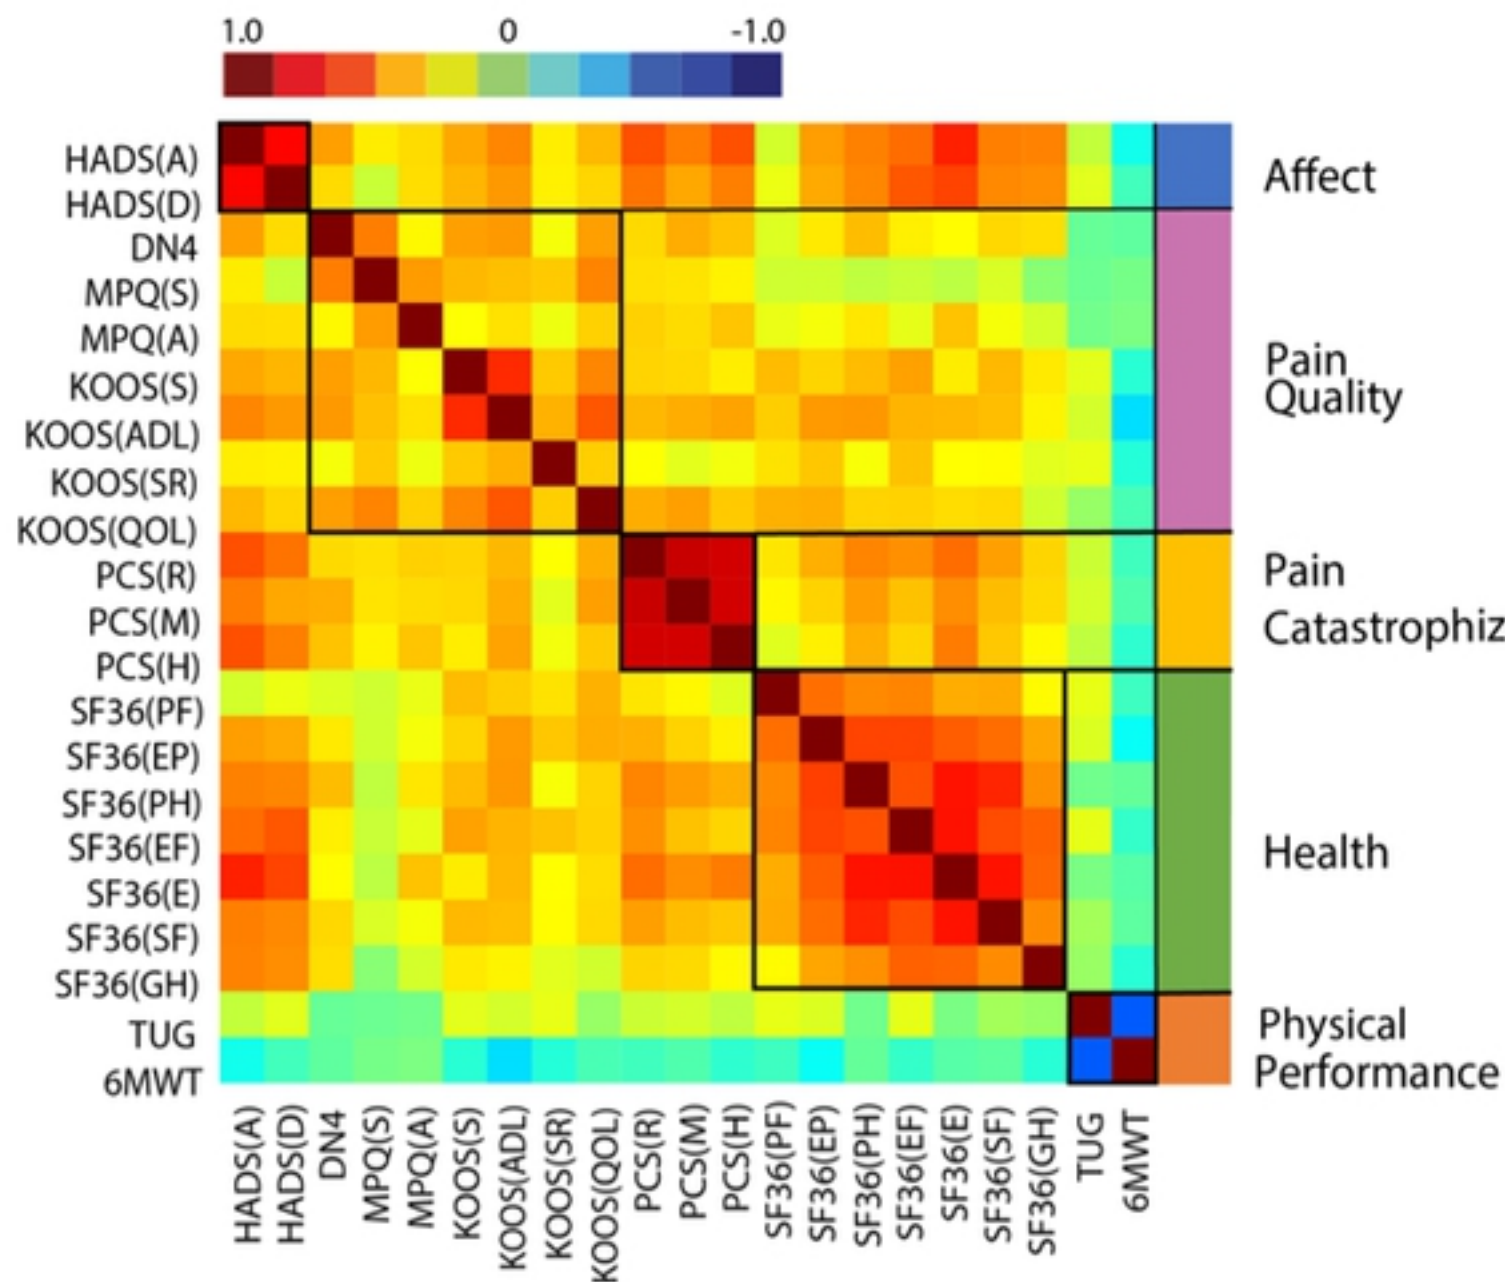

b

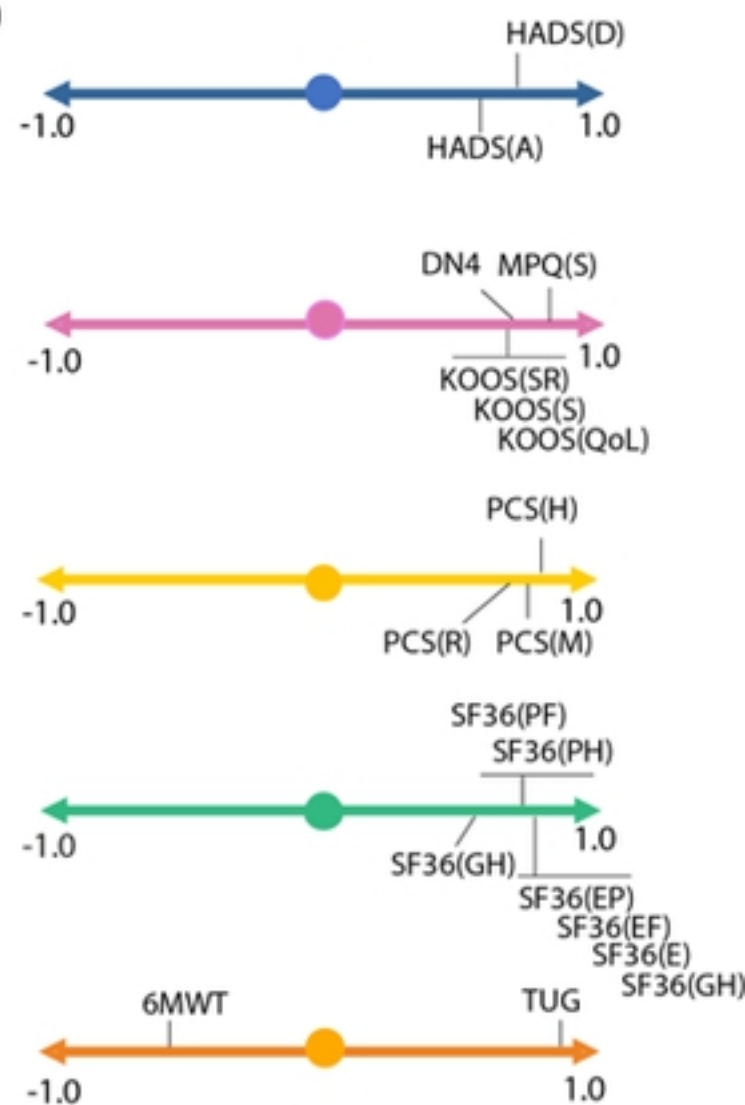

**a**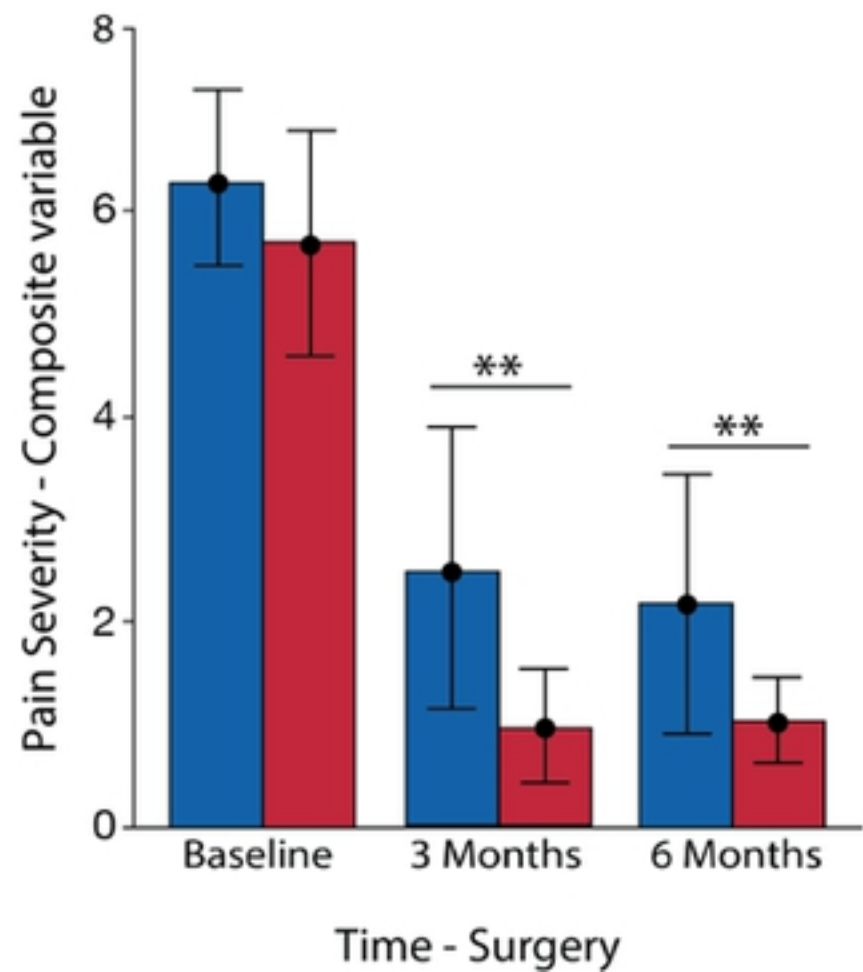**b**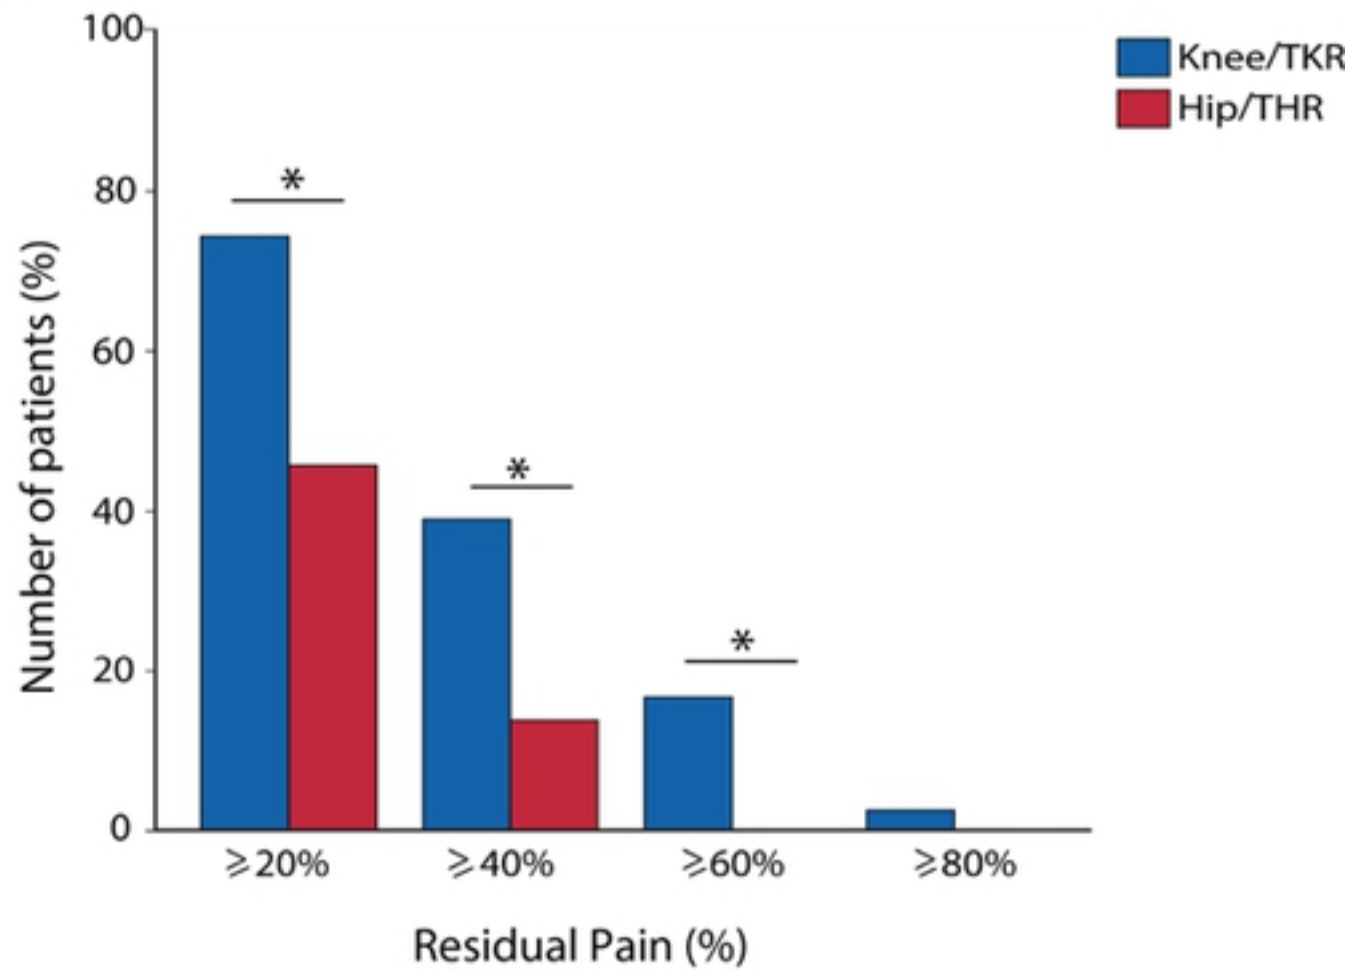



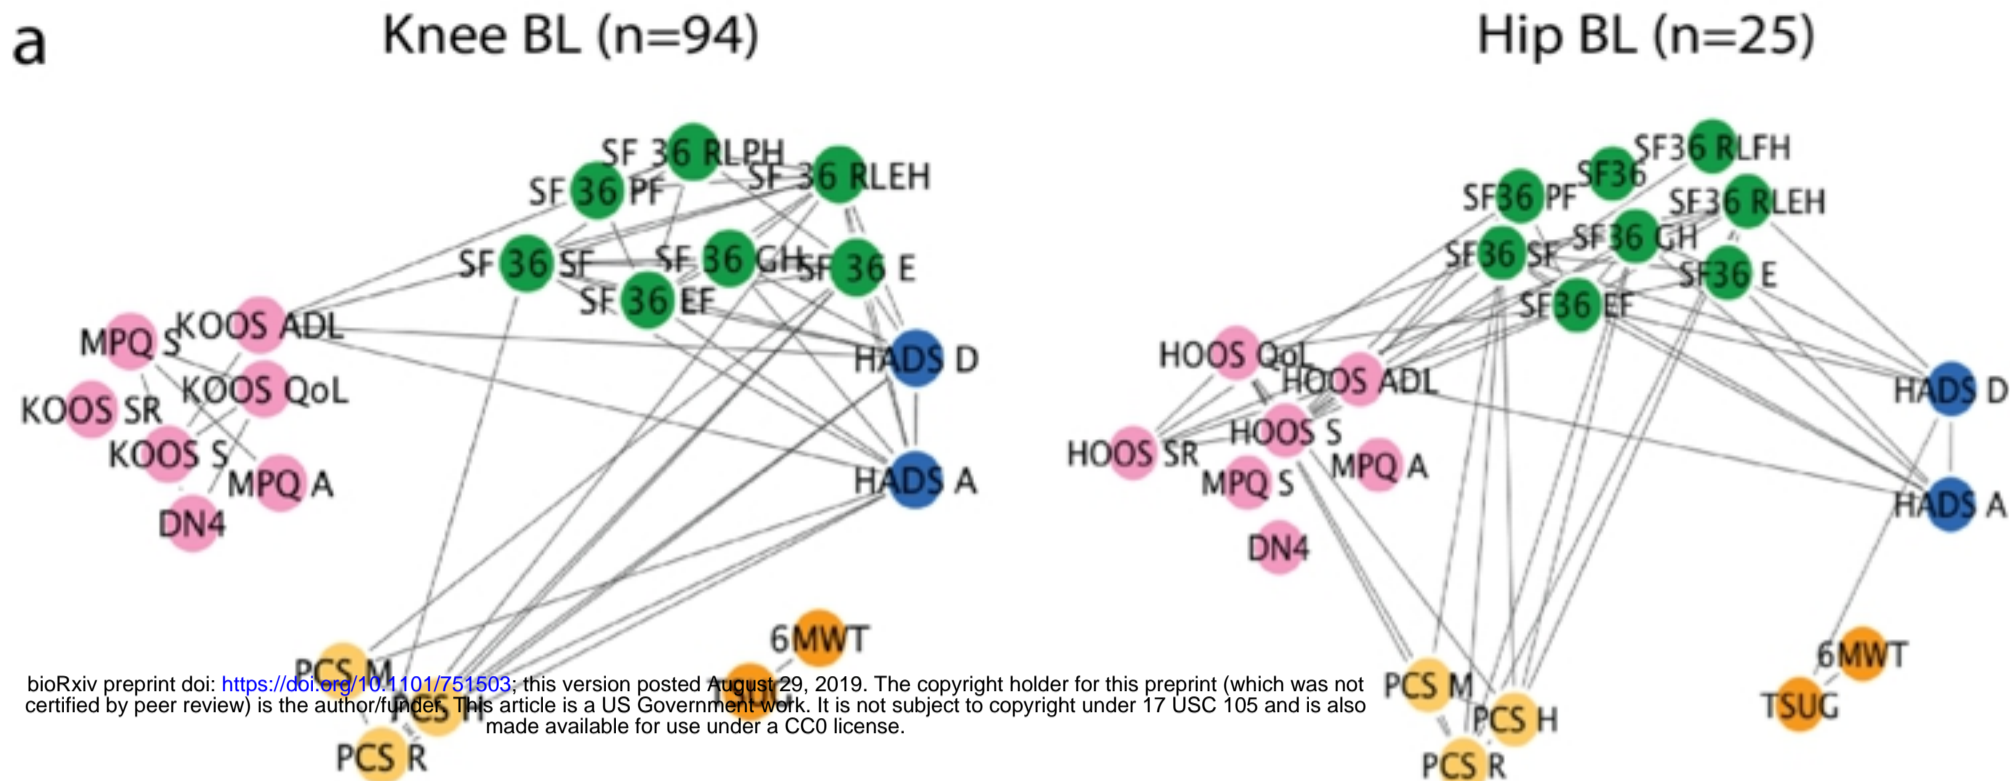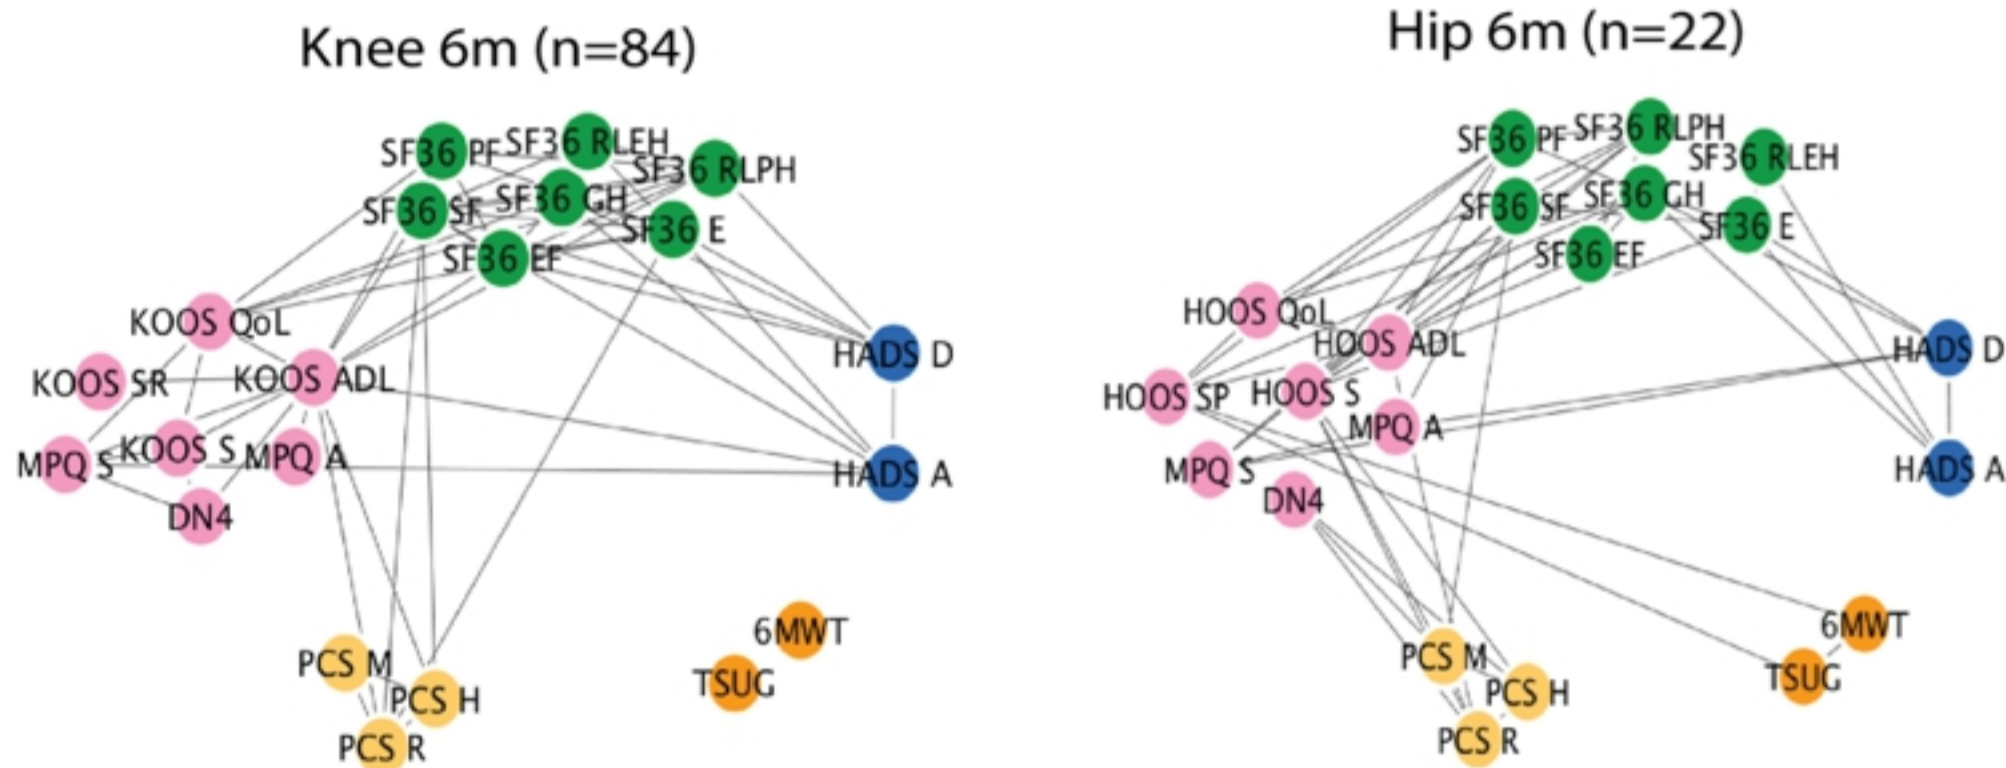

Variable Components: ● Affect ● Pain Quality ● Physical Performance ● Pain Catastrophizing ● Health

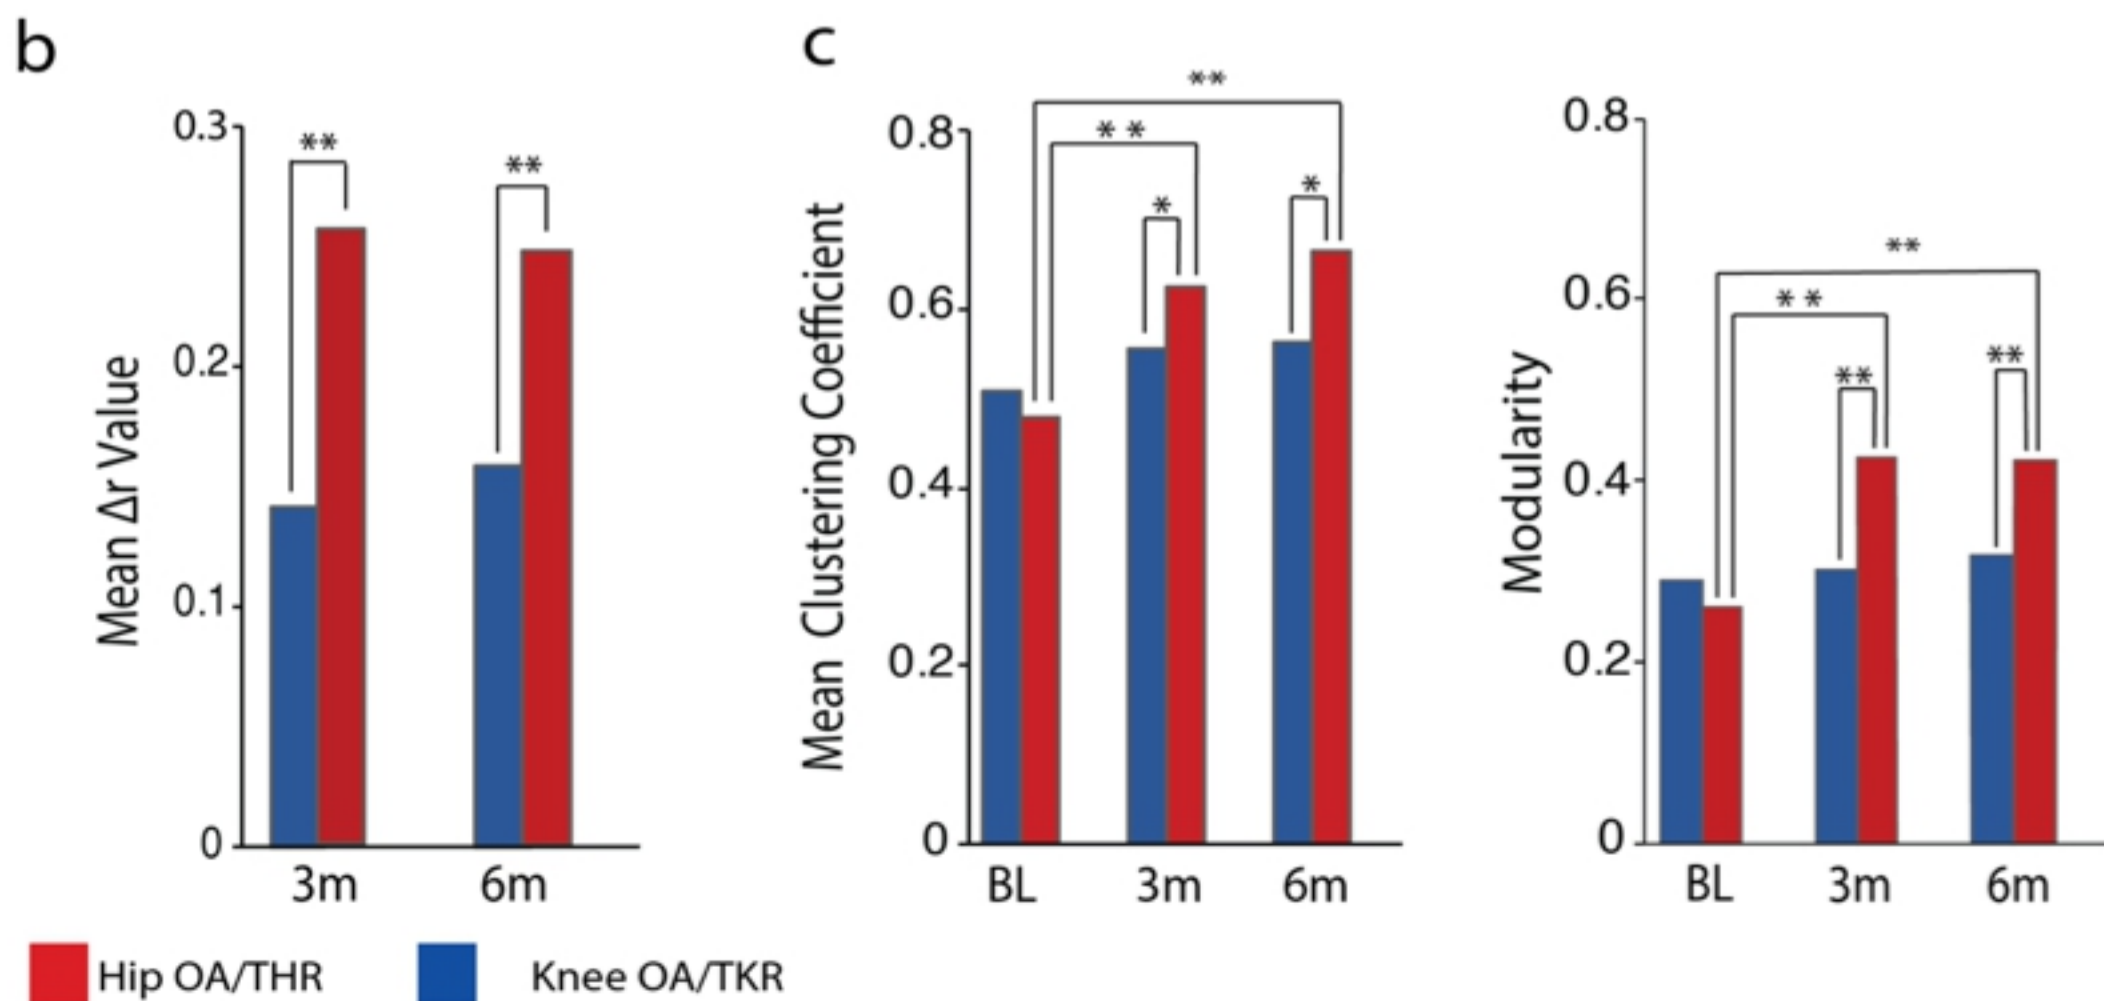

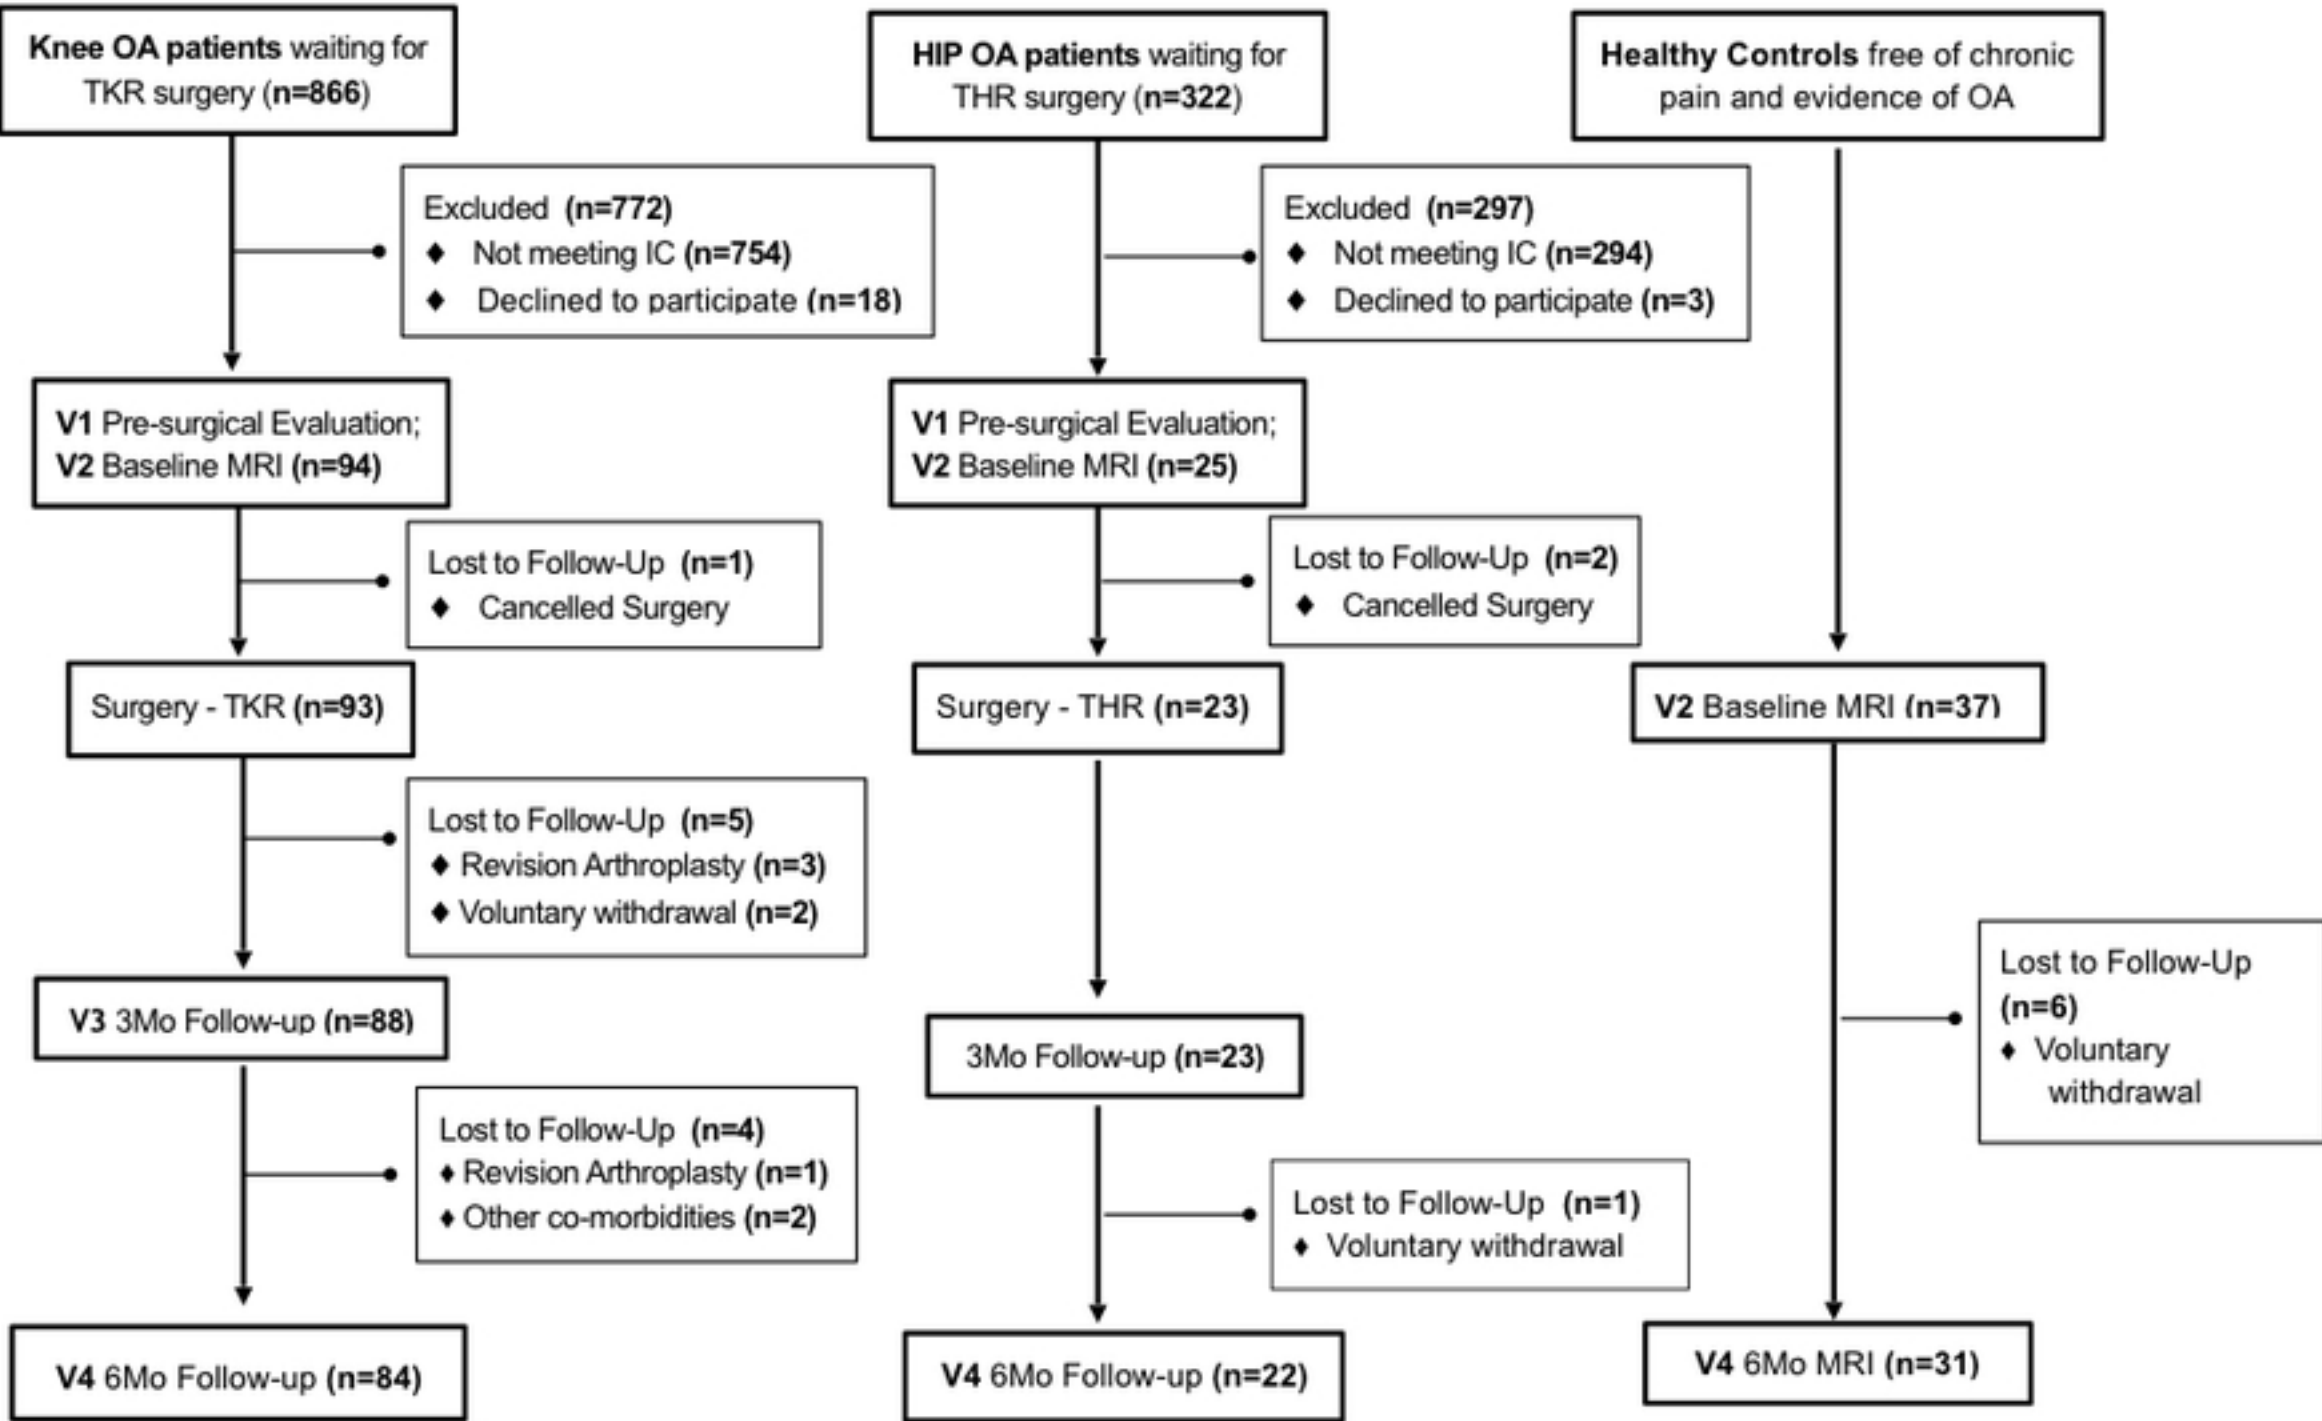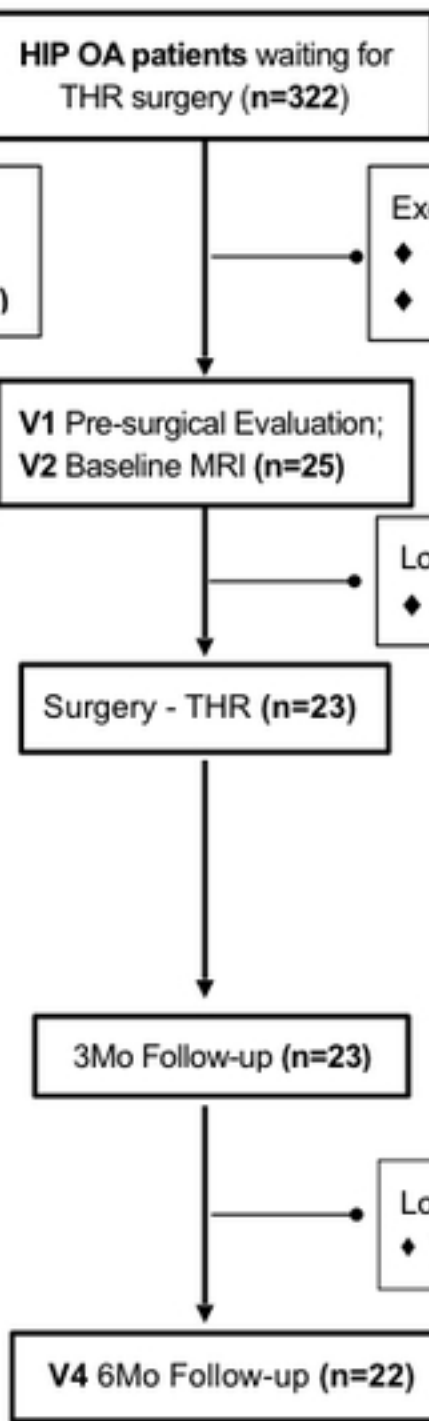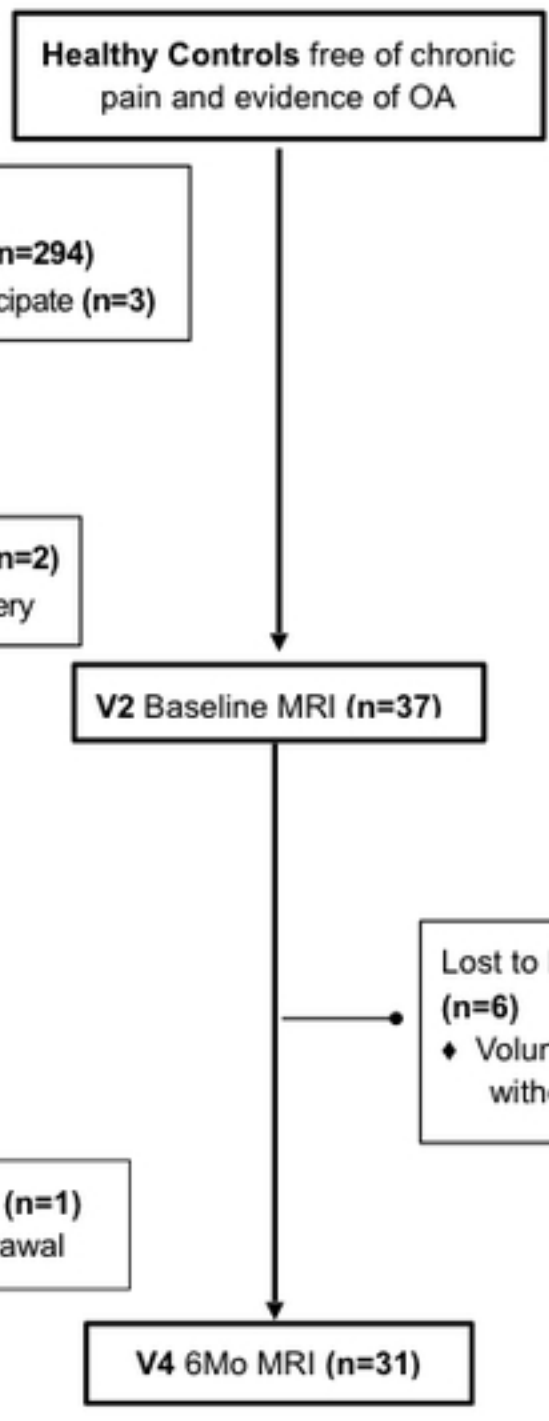

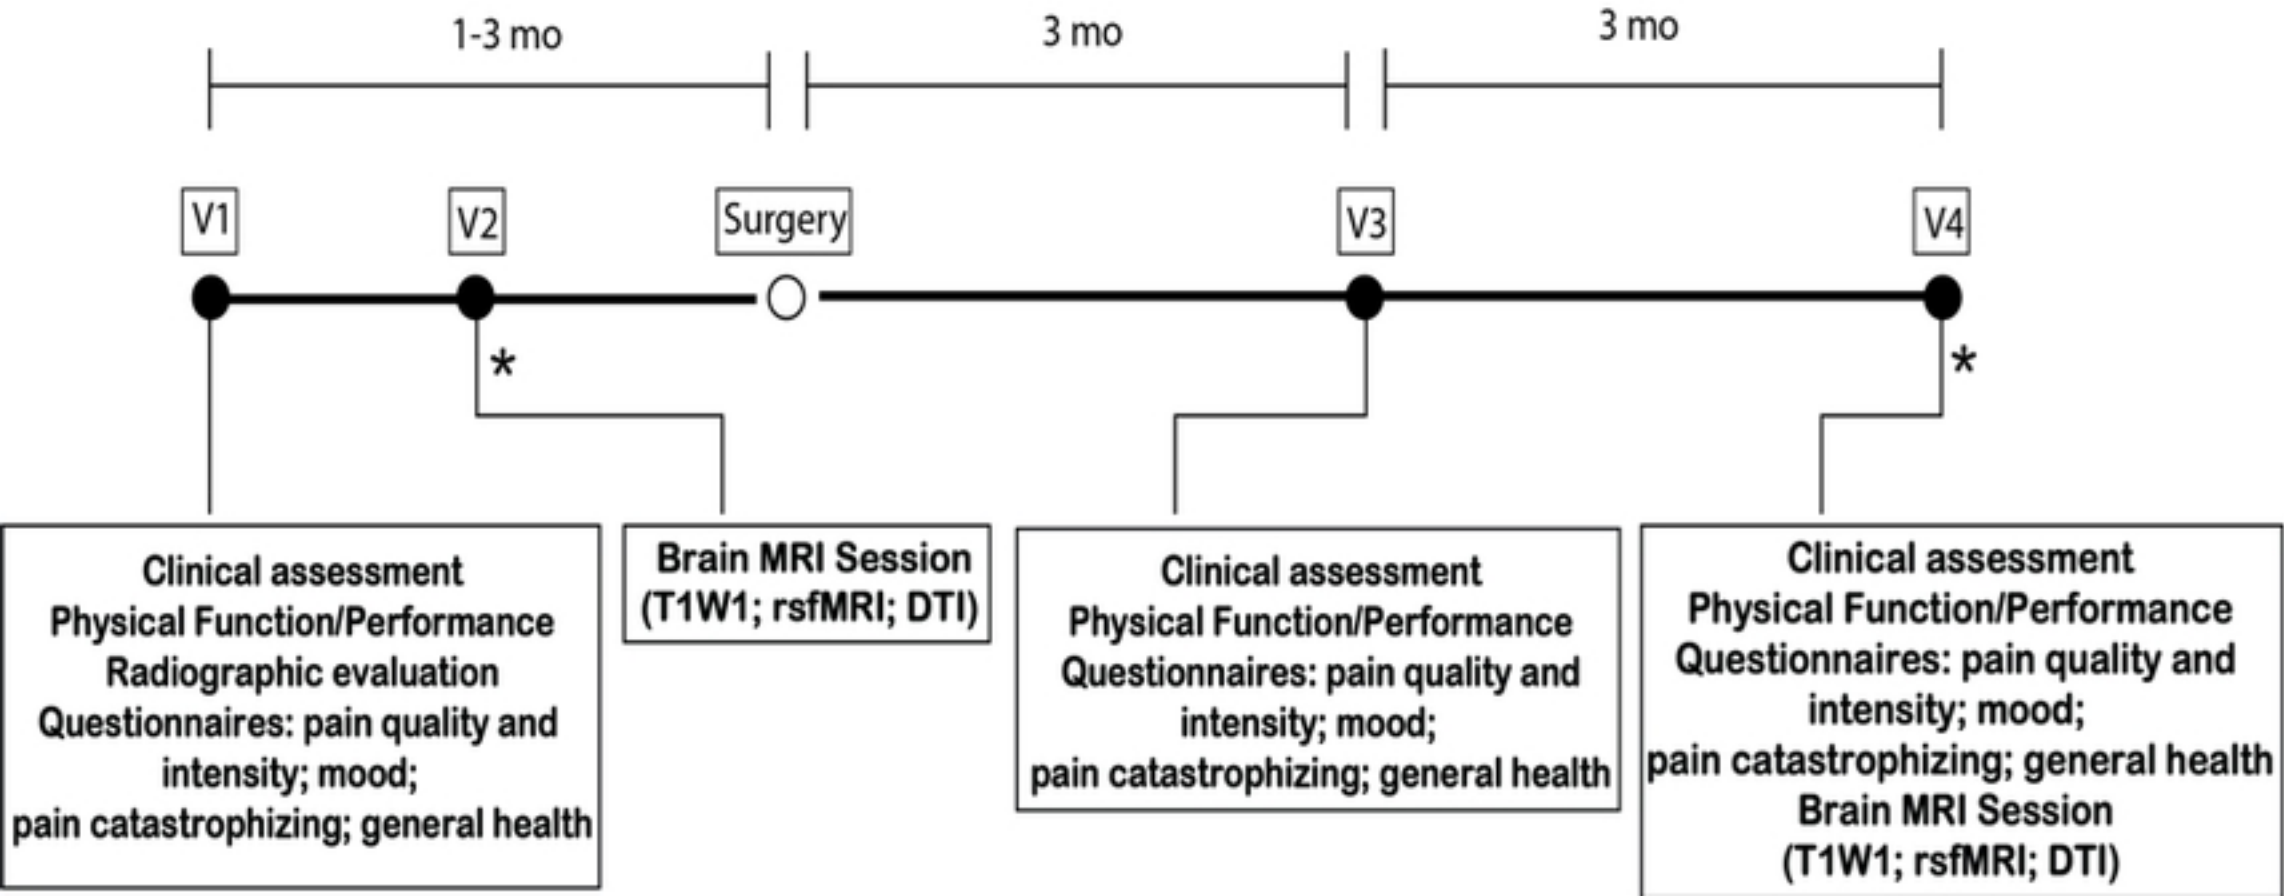

Source: https://www.biorxiv.org/content/10.1101/751503v1.full.pdf
